# Supplementary material for: Molecular patterns of cancer colonisation in lymph nodes of breast cancer patients
Source: PubMed Central journal article supplement (PMC6247766; doi:10.1186/s13058-018-1070-3), 2018-11-20
Supplement: 13058_2018_1070_MOESM1_ESM.pdf [file 13058_2018_1070_MOESM1_ESM.pdf]

| Gene Name | Gene ID   | Change | Study      | Ensembl gene ID |
|-----------|-----------|--------|------------|-----------------|
| APOD      | NM_001647 | DOWN   | Calvo (37) | ENSG00000189058 |
| KRT5      | NM_000424 | DOWN   | Calvo (37) | ENSG00000186081 |
| C11orf43  | X07868    | DOWN   | Calvo (37) | ENSG00000167244 |
| TRIM29    | NM_012101 | DOWN   | Calvo (37) | ENSG00000137699 |
| IL8       | NM_000584 | DOWN   | Calvo (37) | ENSG00000169429 |
| FBLN1     | Z95331    | DOWN   | Calvo (37) | ENSG00000077942 |
| FBLN1     | NM_006486 | DOWN   | Calvo (37) | ENSG00000077942 |
| ANXA8     | NM_001630 | DOWN   | Calvo (37) | ENSG00000265190 |
| F13A1     | NM_000129 | DOWN   | Calvo (37) | ENSG00000124491 |
| MME       | NM_007287 | DOWN   | Calvo (37) | ENSG00000196549 |
| DIO2      | U53506    | DOWN   | Calvo (37) | ENSG00000211448 |
| HEPH      | NM_014799 | DOWN   | Calvo (37) | ENSG00000089472 |
| HPGD      | NM_000860 | DOWN   | Calvo (37) | ENSG00000164120 |
| HPGD      | NM_000860 | DOWN   | Calvo (37) | ENSG00000164120 |
| GULP1     | NM_016315 | DOWN   | Calvo (37) | ENSG00000144366 |
| S100A2    | NM_005978 | DOWN   | Calvo (37) | ENSG00000196754 |
| DST       | NM_001723 | DOWN   | Calvo (37) | ENSG00000151914 |
| GAS1      | NM_002048 | DOWN   | Calvo (37) | ENSG00000180447 |
| MMP1      | NM_002421 | DOWN   | Calvo (37) | ENSG00000196611 |
| VSIG4     | NM_007268 | DOWN   | Calvo (37) | ENSG00000155659 |
| GABRP     | NM_014211 | DOWN   | Calvo (37) | ENSG00000094755 |
| KRT17     | NM_000422 | DOWN   | Calvo (37) | ENSG00000128422 |
| CPA3      | NM_001870 | DOWN   | Calvo (37) | ENSG00000163751 |
| MMP10     | NM_002425 | DOWN   | Calvo (37) | ENSG00000166670 |
| OMD       | NM_005014 | DOWN   | Calvo (37) | ENSG00000127083 |
| DSPG3     | NM_004950 | DOWN   | Calvo (37) | ENSG00000083782 |
| F2RL2     | NM_004101 | DOWN   | Calvo (37) | ENSG00000164220 |
| KCND2     | NM_012281 | DOWN   | Calvo (37) | ENSG00000184408 |
| TNFSF4    | NM_003326 | DOWN   | Calvo (37) | ENSG00000117586 |
| DCN       | BC005322  | DOWN   | Calvo (37) | ENSG00000011465 |
| CHI3L1    | M80927    | DOWN   | Calvo (37) | ENSG00000133048 |
| PTN       | AL565812  | DOWN   | Calvo (37) | ENSG00000105894 |
| CALML3    | M58026    | DOWN   | Calvo (37) | ENSG00000178363 |
| IGFBP3    | M31159    | DOWN   | Calvo (37) | ENSG00000146674 |
| HPGD      | J05594    | DOWN   | Calvo (37) | ENSG00000164120 |
| PTN       | BC005916  | DOWN   | Calvo (37) | ENSG00000105894 |
| DCN       | AF138303  | DOWN   | Calvo (37) | ENSG00000011465 |
| DCN       | AF138302  | DOWN   | Calvo (37) | ENSG00000011465 |
| SNAI2     | Ai572079  | DOWN   | Calvo (37) | ENSG00000019549 |
| PTPRD     | N73931    | DOWN   | Calvo (37) | ENSG00000153707 |
| NPTX2     | U26662    | DOWN   | Calvo (37) | ENSG00000106236 |
| KRT16B    | Ai831452  | DOWN   | Calvo (37) | ENSG00000185479 |
| PTPRD     | BF062299  | DOWN   | Calvo (37) | ENSG00000153707 |
| DOK5      | AL050069  | DOWN   | Calvo (37) | ENSG00000101134 |
| GREM1     | NM_013372 | DOWN   | Calvo (37) | ENSG00000166923 |
| GREM1     | NM_013372 | DOWN   | Calvo (37) | ENSG00000166923 |
| EGFL6     | NM_015507 | DOWN   | Calvo (37) | ENSG00000198759 |
| PDPN      | AU154455  | DOWN   | Calvo (37) | ENSG00000162493 |
| EPHA3     | AF213459  | DOWN   | Calvo (37) | ENSG00000044524 |
| HTR2B     | NM_000867 | DOWN   | Calvo (37) | ENSG00000135914 |
| CD1A      | M28825    | DOWN   | Calvo (37) | ENSG00000158477 |
| DKK2      | NM_014421 | DOWN   | Calvo (37) | ENSG00000155011 |
| DDR1      | U48705    | DOWN   | Calvo (37) | ENSG00000204580 |
| CCL5      | M21121    | DOWN   | Calvo (37) | ENSG00000271503 |
| EPHB3     | X75208    | DOWN   | Calvo (37) | ENSG00000182580 |
| CYP2A6    | M33318    | DOWN   | Calvo (37) | ENSG00000255974 |
| MMP14     | Z48481    | DOWN   | Calvo (37) | ENSG00000157227 |
| PRPF8     | NM_006445 | DOWN   | Calvo (37) | ENSG00000174231 |
| EIF3S7    | NM_003753 | DOWN   | Calvo (37) | ENSG00000100353 |
| ATP6V0B   | BC005876  | DOWN   | Calvo (37) | ENSG00000117410 |
| MSN       | NM_002444 | DOWN   | Calvo (37) | ENSG00000147065 |
| DSP       | NM_004415 | DOWN   | Calvo (37) | ENSG00000096696 |
| PTPRF     | AU145351  | DOWN   | Calvo (37) | ENSG00000142949 |
| PTPRF     | NM_002840 | DOWN   | Calvo (37) | ENSG00000142949 |
| PTPRF     | Ai762627  | DOWN   | Calvo (37) | ENSG00000142949 |
| S100A11   | NM_005620 | DOWN   | Calvo (37) | ENSG00000163191 |
| SPARC     | NM_003118 | DOWN   | Calvo (37) | ENSG00000113140 |
| XBP1      | NM_005080 | DOWN   | Calvo (37) | ENSG00000100219 |
| SPTBN1    | N92501    | DOWN   | Calvo (37) | ENSG00000115306 |
| SPTBN1    | NM_003128 | DOWN   | Calvo (37) | ENSG00000115306 |
| SFRS11    | AU146237  | DOWN   | Calvo (37) | ENSG00000116754 |
| KDELRL2   | AL542253  | DOWN   | Calvo (37) | ENSG00000136240 |
| KDELRL2   | AL542253  | DOWN   | Calvo (37) | ENSG00000136240 |
| SKP1A     | BE964043  | DOWN   | Calvo (37) | ENSG00000113558 |
| CALU      | BF939365  | DOWN   | Calvo (37) | ENSG00000128595 |
| CALU      | U67280    | DOWN   | Calvo (37) | ENSG00000128595 |
| CALU      | NM_001219 | DOWN   | Calvo (37) | ENSG00000128595 |
| ARL6IP5   | N92494    | DOWN   | Calvo (37) | ENSG00000144746 |
| CTNNA1    | Ai826881  | DOWN   | Calvo (37) | ENSG00000044115 |
| CTNNA1    | NM_001903 | DOWN   | Calvo (37) | ENSG00000044115 |
| CTSD      | NM_001909 | DOWN   | Calvo (37) | ENSG00000117984 |
| ODC1      | NM_002539 | DOWN   | Calvo (37) | ENSG00000115758 |
| HSPA1A    | NM_005345 | DOWN   | Calvo (37) | ENSG00000204389 |
| PLOD1     | NM_000302 | DOWN   | Calvo (37) | ENSG00000083444 |
| SCD       | AA678241  | DOWN   | Calvo (37) | ENSG00000099194 |

|          |           |      |            |                 |
|----------|-----------|------|------------|-----------------|
| SCD      | AB032261  | DOWN | Calvo (37) | ENSG00000099194 |
| DHCR24   | NM_014762 | DOWN | Calvo (37) | ENSG00000116133 |
| CKB      | NM_001823 | DOWN | Calvo (37) | ENSG00000166165 |
| PPM1J    | NM_005167 | DOWN | Calvo (37) | ENSG00000155367 |
| FKBP4    | NM_002014 | DOWN | Calvo (37) | ENSG00000004478 |
| FKBP4    | NM_002014 | DOWN | Calvo (37) | ENSG00000004478 |
| PALLD    | NM_016081 | DOWN | Calvo (37) | ENSG00000129116 |
| MGEA5    | AK002091  | DOWN | Calvo (37) | ENSG00000198408 |
| HLA-E    | X56841    | DOWN | Calvo (37) | ENSG00000204592 |
| HLA-E    | NM_005516 | DOWN | Calvo (37) | ENSG00000204592 |
| PALLD    | NM_016081 | DOWN | Calvo (37) | ENSG00000129116 |
| PALLD    | AU157932  | DOWN | Calvo (37) | ENSG00000129116 |
| TACC1    | NM_006283 | DOWN | Calvo (37) | ENSG00000147526 |
| BTG1     | AL535380  | DOWN | Calvo (37) | ENSG00000133639 |
| BTG1     | NM_001731 | DOWN | Calvo (37) | ENSG00000133639 |
| LGALS3BP | NM_005567 | DOWN | Calvo (37) | ENSG00000108679 |
| HSBP1    | AK026575  | DOWN | Calvo (37) | ENSG00000230989 |
| HSBP1    | NM_001537 | DOWN | Calvo (37) | ENSG00000230989 |
| CCND2    | A1635187  | DOWN | Calvo (37) | ENSG00000118971 |
| CCND2    | NM_001759 | DOWN | Calvo (37) | ENSG00000118971 |
| TBC1D8   | A1348010  | DOWN | Calvo (37) | ENSG00000204634 |
| ABLM1    | NM_006720 | DOWN | Calvo (37) | ENSG00000099204 |
| ANXA6    | NM_001155 | DOWN | Calvo (37) | ENSG00000197043 |
| CKAP4    | AW029619  | DOWN | Calvo (37) | ENSG00000136026 |
| CKAP4    | NM_006825 | DOWN | Calvo (37) | ENSG00000136026 |
| CD9      | NM_001769 | DOWN | Calvo (37) | ENSG00000010278 |
| TXNIP    | NM_006472 | DOWN | Calvo (37) | ENSG00000265972 |
| TXNIP    | NM_006472 | DOWN | Calvo (37) | ENSG00000265972 |
| TXNIP    | NM_006472 | DOWN | Calvo (37) | ENSG00000265972 |
| JUP      | NM_021991 | DOWN | Calvo (37) | ENSG00000173801 |
| DSTN     | BF697964  | DOWN | Calvo (37) | ENSG00000125868 |
| DSTN     | BF697964  | DOWN | Calvo (37) | ENSG00000125868 |
| LDHB     | NM_002300 | UP   | Calvo (37) | ENSG00000111716 |
| ADD3     | BE545756  | UP   | Calvo (37) | ENSG00000148700 |
| CTTN     | NM_005231 | UP   | Calvo (37) | ENSG00000085733 |
| LGALS1   | NM_002305 | UP   | Calvo (37) | ENSG00000100097 |
| THBS1    | A1812030  | UP   | Calvo (37) | ENSG00000137801 |
| THBS1    | NM_003246 | UP   | Calvo (37) | ENSG00000137801 |
| THBS1    | AV726673  | UP   | Calvo (37) | ENSG00000137801 |
| THBS1    | NM_003246 | UP   | Calvo (37) | ENSG00000137801 |
| ITGB5    | AL048423  | UP   | Calvo (37) | ENSG00000082781 |
| ITGB5    | NM_002213 | UP   | Calvo (37) | ENSG00000082781 |
| CDH1     | NM_004360 | UP   | Calvo (37) | ENSG00000039068 |
| CDH1     | NM_004360 | UP   | Calvo (37) | ENSG00000039068 |
| HLA-DPB1 | NM_002121 | UP   | Calvo (37) | ENSG00000223865 |
| GPNMB    | NM_002510 | UP   | Calvo (37) | ENSG00000136235 |
| TIMP3    | NM_000362 | UP   | Calvo (37) | ENSG00000100234 |
| MBNL1    | BF512200  | UP   | Calvo (37) | ENSG00000152601 |
| MBNL1    | N31913    | UP   | Calvo (37) | ENSG00000152601 |
| MBNL1    | N31913    | UP   | Calvo (37) | ENSG00000152601 |
| HTRA1    | NM_002775 | UP   | Calvo (37) | ENSG00000166033 |
| DDX3X    | NM_001356 | UP   | Calvo (37) | ENSG00000215301 |
| PLS3     | NM_005032 | UP   | Calvo (37) | ENSG00000102024 |
| CTBP2    | N23018    | UP   | Calvo (37) | ENSG00000175029 |
| ZRANB1   | AW269836  | UP   | Calvo (37) | ENSG00000019995 |
| CTBP2    | NM_001329 | UP   | Calvo (37) | ENSG00000175029 |
| ATP1B1   | BC000006  | UP   | Calvo (37) | ENSG00000143153 |
| ATP1B1   | NM_001677 | UP   | Calvo (37) | ENSG00000143153 |
| SYPL1    | A1768845  | UP   | Calvo (37) | ENSG00000008282 |
| BGN      | BC002416  | UP   | Calvo (37) | ENSG00000182492 |
| BGN      | BC002416  | UP   | Calvo (37) | ENSG00000182492 |
| SDC1     | NM_002997 | UP   | Calvo (37) | ENSG00000115884 |
| ARHGDIB  | NM_001175 | UP   | Calvo (37) | ENSG00000111348 |
| CYR61    | NM_001554 | UP   | Calvo (37) | ENSG00000142871 |
| MOBK1B   | NM_018221 | UP   | Calvo (37) | ENSG00000114978 |
| ANP32B   | NM_006401 | UP   | Calvo (37) | ENSG00000136938 |
| C5orf13  | NM_004772 | UP   | Calvo (37) | ENSG00000134986 |
| C5orf13  | NM_004772 | UP   | Calvo (37) | ENSG00000134986 |
| EMP1     | NM_001423 | UP   | Calvo (37) | ENSG00000134531 |
| EMP1     | NM_001423 | UP   | Calvo (37) | ENSG00000134531 |
| ETS2     | AL575509  | UP   | Calvo (37) | ENSG00000157557 |
| ETS2     | NM_005239 | UP   | Calvo (37) | ENSG00000157557 |
| ENC1     | AF010314  | UP   | Calvo (37) | ENSG00000171617 |
| ENC1     | NM_003633 | UP   | Calvo (37) | ENSG00000171617 |
| SLC9A3R1 | NM_004252 | UP   | Calvo (37) | ENSG00000109062 |
| ZFP36L2  | A1356398  | UP   | Calvo (37) | ENSG00000152518 |
| ZFP36L2  | A1356398  | UP   | Calvo (37) | ENSG00000152518 |
| ZFP36L2  | NM_006887 | UP   | Calvo (37) | ENSG00000152518 |
| UCHL1    | NM_004181 | UP   | Calvo (37) | ENSG00000154277 |
| ADRBK1   | M80776    | UP   | Calvo (37) | ENSG00000173020 |
| MGST3    | NM_004528 | UP   | Calvo (37) | ENSG00000143198 |
| SOX4     | NM_003107 | UP   | Calvo (37) | ENSG00000124766 |
| SOX4     | AL136179  | UP   | Calvo (37) | ENSG00000124766 |
| SOX4     | NM_003107 | UP   | Calvo (37) | ENSG00000124766 |
| CLDN4    | NM_001305 | UP   | Calvo (37) | ENSG00000189143 |
| DPYSL3   | NM_001387 | UP   | Calvo (37) | ENSG00000113657 |

|          |           |      |            |                 |
|----------|-----------|------|------------|-----------------|
| COL6A3   | NM_004369 | UP   | Calvo (37) | ENSG00000163359 |
| NQO1     | A1039874  | UP   | Calvo (37) | ENSG00000181019 |
| NQO1     | NM_000903 | UP   | Calvo (37) | ENSG00000181019 |
| CTSC     | NM_001814 | UP   | Calvo (37) | ENSG00000109861 |
| PRCP     | NM_005040 | UP   | Calvo (37) | ENSG00000137509 |
| LAMB1    | NM_002291 | UP   | Calvo (37) | ENSG00000091136 |
| IGFBP4   | NM_001552 | UP   | Calvo (37) | ENSG00000141753 |
| ELF3     | AF017307  | UP   | Calvo (37) | ENSG00000163435 |
| RPA1     | NM_002945 | UP   | Calvo (37) | ENSG00000132383 |
| RPA1     | NM_002945 | UP   | Calvo (37) | ENSG00000132383 |
| FHL1     | U29538    | UP   | Calvo (37) | ENSG00000022267 |
| FHL1     | NM_001449 | UP   | Calvo (37) | ENSG00000022267 |
| SAR1A    | NM_020150 | UP   | Calvo (37) | ENSG00000079332 |
| JARID1B  | NM_006618 | UP   | Calvo (37) | ENSG00000117139 |
| SORD     | L29008    | UP   | Calvo (37) | ENSG00000140263 |
| SORD     | L29008    | UP   | Calvo (37) | ENSG00000140263 |
| FSCN1    | NM_003088 | UP   | Calvo (37) | ENSG00000075618 |
| NME1     | NM_000269 | UP   | Calvo (37) | ENSG00000239672 |
| FAT      | NM_005245 | UP   | Calvo (37) | ENSG00000083857 |
| ANXA2    | NM_004039 | UP   | Calvo (37) | ENSG00000182718 |
| KRT18    | NM_000224 | UP   | Calvo (37) | ENSG00000111057 |
| CNN2     | NM_004368 | UP   | Calvo (37) | ENSG00000064666 |
| NBL1     | NM_005380 | UP   | Calvo (37) | ENSG00000158747 |
| IER3     | NM_003897 | UP   | Calvo (37) | ENSG00000137331 |
| RAVER2   | AL039831  | UP   | Calvo (37) | ENSG00000162437 |
| KRT19    | NM_002276 | UP   | Calvo (37) | ENSG00000171345 |
| ACSL3    | AL525798  | UP   | Calvo (37) | ENSG00000123983 |
| ACSL3    | D89053    | UP   | Calvo (37) | ENSG00000123983 |
| ACSL3    | D89053    | UP   | Calvo (37) | ENSG00000123983 |
| TIMP1    | NM_003254 | UP   | Calvo (37) | ENSG00000102265 |
| GJA1     | NM_000165 | UP   | Calvo (37) | ENSG00000152661 |
| DLG5     | AB011155  | UP   | Calvo (37) | ENSG00000151208 |
| TPD52    | NM_005079 | UP   | Calvo (37) | ENSG00000076554 |
| TPD52    | AA524023  | UP   | Calvo (37) | ENSG00000076554 |
| TPD52    | NM_005079 | UP   | Calvo (37) | ENSG00000076554 |
| CCND3    | NM_001760 | UP   | Calvo (37) | ENSG00000112576 |
| ENTPD6   | NM_001247 | UP   | Calvo (37) | ENSG00000197586 |
| TUBG1    | NM_001070 | UP   | Calvo (37) | ENSG00000131462 |
| EPB41L2  | BF511685  | UP   | Calvo (37) | ENSG00000079819 |
| EPB41L2  | NM_001431 | UP   | Calvo (37) | ENSG00000079819 |
| LAPTM5   | A1589086  | UP   | Calvo (37) | ENSG00000162511 |
| LAPTM5   | NM_006762 | UP   | Calvo (37) | ENSG00000162511 |
| LUM      | NM_002345 | UP   | Calvo (37) | ENSG00000139329 |
| PTK9     | NM_002822 | UP   | Calvo (37) | ENSG00000151239 |
| ADD3     | A1763123  | UP   | Calvo (37) | ENSG00000148700 |
| ADD3     | NM_019903 | UP   | Calvo (37) | ENSG00000148700 |
| COX6C    | NM_004374 | UP   | Calvo (37) | ENSG00000164919 |
| MCM5     | NM_006739 | UP   | Calvo (37) | ENSG00000100297 |
| TMEM106C | NM_024056 | UP   | Calvo (37) | ENSG00000134291 |
| AIP      | AL558532  | UP   | Calvo (37) | ENSG00000110711 |
| AIP      | NM_003977 | UP   | Calvo (37) | ENSG00000110711 |
| FBLN1    | NM_001996 | UP   | Calvo (37) | ENSG00000077942 |
| DHCR7    | AW150953  | UP   | Calvo (37) | ENSG00000172893 |
| DHCR7    | NM_001360 | UP   | Calvo (37) | ENSG00000172893 |
| AEBP1    | NM_001129 | UP   | Calvo (37) | ENSG00000106624 |
| LBR      | NM_002296 | UP   | Calvo (37) | ENSG00000143815 |
| FER1L3   | NM_013451 | UP   | Calvo (37) | ENSG00000138119 |
| SH3BP5   | NM_004844 | UP   | Calvo (37) | ENSG00000131370 |
| TOMM7    | NM_019059 | UP   | Calvo (37) | ENSG00000196683 |
| TIMM17A  | NM_006335 | UP   | Calvo (37) | ENSG00000134375 |
| RNF14    | AB022663  | UP   | Calvo (37) | ENSG00000013561 |
| SCCPDH   | NM_016002 | UP   | Calvo (37) | ENSG00000143653 |
| TACSTD1  | NM_002354 | UP   | Calvo (37) | ENSG00000119888 |
| HSPB1    | NM_001540 | UP   | Calvo (37) | ENSG00000106211 |
| EFEMP1   | NM_004105 | UP   | Calvo (37) | ENSG00000115380 |
| BNIP3    | U15174    | UP   | Calvo (37) | ENSG00000176171 |
| BNIP3    | NM_004052 | UP   | Calvo (37) | ENSG00000176171 |
| SFRP2    | AF311912  | DOWN | Feng (38)  | ENSG00000145423 |
| COL11A1  | NM_001854 | DOWN | Feng (38)  | ENSG00000060718 |
| PDGFRL   | NM_006207 | DOWN | Feng (38)  | ENSG00000104213 |
| MMP2     | NM_004530 | DOWN | Feng (38)  | ENSG00000087245 |
| CTSK     | NM_000396 | DOWN | Feng (38)  | ENSG00000143387 |
| MMP7     | NM_002423 | DOWN | Feng (38)  | ENSG00000137673 |
| ASPN     | NM_017680 | DOWN | Feng (38)  | ENSG00000106819 |
| ITGBL1   | NM_004791 | DOWN | Feng (38)  | ENSG00000198542 |
| OSF-2    | NM_006475 | DOWN | Feng (38)  | ENSG00000133110 |
| COL6A1   | NM_001848 | DOWN | Feng (38)  | ENSG00000142156 |
| FMO1     | NM_002021 | DOWN | Feng (38)  | ENSG00000010932 |
| COL5A2   | NM_000393 | DOWN | Feng (38)  | ENSG00000204262 |
| HTRA3    | AY040094  | DOWN | Feng (38)  | ENSG00000170801 |
| SPOCK    | NM_004598 | DOWN | Feng (38)  | ENSG00000152377 |
| LUM      | NM_002345 | DOWN | Feng (38)  | ENSG00000139329 |
| SPON1    | AB018305  | DOWN | Feng (38)  | ENSG00000262655 |
| CILP     | NM_003613 | DOWN | Feng (38)  | ENSG00000138615 |
| PTPRC    | NM_002838 | DOWN | Feng (38)  | ENSG00000081237 |
| LGALS1   | NM_002305 | DOWN | Feng (38)  | ENSG00000100097 |

|          |              |      |             |                 |
|----------|--------------|------|-------------|-----------------|
| PRSS11   | NM_002775    | DOWN | Feng (38)   | ENSG00000166033 |
| OGN      | NM_033014    | DOWN | Feng (38)   | ENSG00000106809 |
| ECM1     | NM_004425    | DOWN | Feng (38)   | ENSG00000143369 |
| STEAP    | NM_012449    | DOWN | Feng (38)   | ENSG00000164647 |
| SNAI2    | BC014890     | DOWN | Feng (38)   | ENSG00000019549 |
| FN1      | NM_002026    | DOWN | Feng (38)   | ENSG00000115414 |
| TNFAIP6  | NM_007115    | DOWN | Feng (38)   | ENSG00000123610 |
| COL1A2   | NM_000089    | DOWN | Feng (38)   | ENSG00000164692 |
| COL3A1   | NM_000090    | DOWN | Feng (38)   | ENSG00000168542 |
| FBN1     | NM_000138    | DOWN | Feng (38)   | ENSG00000166147 |
| CCL8     | Y16645       | DOWN | Feng (38)   | ENSG00000108700 |
| CALU     | NM_001219    | DOWN | Feng (38)   | ENSG00000128595 |
| CSPG2    | U16306       | DOWN | Feng (38)   | ENSG00000038427 |
| GNPMB    | NM_002510    | DOWN | Feng (38)   | ENSG00000136235 |
| RUNX2    | AW469546     | DOWN | Feng (38)   | ENSG00000124813 |
| GRP      | NM_002091    | DOWN | Feng (38)   | ENSG00000134443 |
| PCOLCE   | NM_002593    | DOWN | Feng (38)   | ENSG00000106333 |
| TGFB3    | NM_003239    | DOWN | Feng (38)   | ENSG00000119699 |
| COL5A1   | NM_000093    | DOWN | Feng (38)   | ENSG00000130635 |
| CDC45L   | NM_003504    | DOWN | Feng (38)   | ENSG00000093009 |
| KRT14    | NM_000526    | DOWN | Feng (38)   | ENSG00000186847 |
| CTHRC1   | BC014245     | DOWN | Feng (38)   | ENSG00000164932 |
| RAFTLIN  | D42043       | DOWN | Feng (38)   | ENSG00000131378 |
| MRC2     | NM_006039    | DOWN | Feng (38)   | ENSG00000011028 |
| RIS1     | AF438313     | DOWN | Feng (38)   | ENSG00000249992 |
| CORO1A   | NM_007074    | DOWN | Feng (38)   | ENSG00000102879 |
| FCGR3A   | J04162       | DOWN | Feng (38)   | ENSG00000203747 |
| FOXO1A   | NM_002015    | DOWN | Feng (38)   | ENSG00000150907 |
| CR2      | NM_001877    | DOWN | Feng (38)   | ENSG00000117322 |
| TXNIP    | NM_006472    | DOWN | Feng (38)   | ENSG00000265972 |
| CD48     | NM_001778    | DOWN | Feng (38)   | ENSG00000117091 |
| PDK4     | AF334710     | DOWN | Feng (38)   | ENSG00000004799 |
| ABCC1    | NM_004996    | DOWN | Feng (38)   | ENSG00000103222 |
| PRG1     | NM_002727    | DOWN | Feng (38)   | ENSG00000122862 |
| CKTSF1B1 | NM_013372    | DOWN | Feng (38)   | ENSG00000276886 |
| PDE6H    | NM_006205_22 | UP   | Feng (38)   | ENSG00000139053 |
| MS4A1    | NM_021950_21 | UP   | Feng (38)   | ENSG00000156738 |
| C7       | NM_000587_21 | UP   | Feng (38)   | ENSG00000112936 |
| LTB      | NM_002341_18 | UP   | Feng (38)   | ENSG00000227507 |
| SELL     | NM_000655_18 | UP   | Feng (38)   | ENSG00000188404 |
| RGS1     | NM_002922_18 | UP   | Feng (38)   | ENSG00000090104 |
| FCRLA    | NM_032738_17 | UP   | Feng (38)   | ENSG00000132185 |
| BIRC3    | AF070674     | UP   | Feng (38)   | ENSG00000023445 |
| TNFAIP3  | NM_006290_17 | UP   | Feng (38)   | ENSG00000118503 |
| DUSP2    | NM_004418_16 | UP   | Feng (38)   | ENSG00000158050 |
| ZFP36L2  | U07802       | UP   | Feng (38)   | ENSG00000152518 |
| HBB      | NM_000518_15 | UP   | Feng (38)   | ENSG00000244734 |
| TCL1A    | NM_021966_15 | UP   | Feng (38)   | ENSG00000100721 |
| KLF2     | NM_016270_15 | UP   | Feng (38)   | ENSG00000127528 |
| GPR183   | NM_004951_15 | UP   | Feng (38)   | ENSG00000169508 |
| KRT15    | NM_002275_15 | UP   | Feng (38)   | ENSG00000171346 |
| CCL19    | NM_006274_15 | UP   | Feng (38)   | ENSG00000172724 |
| NEFL     | NM_006158_14 | UP   | Feng (38)   | ENSG00000277586 |
| PIGR     | AK026320     | UP   | Feng (38)   | ENSG00000162896 |
|          | NM_003726    | UP   | Hao (39)    | ENSG00000141293 |
|          | NM_002382    | UP   | Hao (39)    | ENSG00000125952 |
|          | NM_005000    | UP   | Hao (39)    | ENSG00000128609 |
|          | NM_005050    | UP   | Hao (39)    | ENSG00000119688 |
|          | NM_004431    | UP   | Hao (39)    | ENSG00000142627 |
|          | NM_003355    | UP   | Hao (39)    | ENSG00000175567 |
|          | NM_004417    | UP   | Hao (39)    | ENSG00000120129 |
|          | NM_001406    | UP   | Hao (39)    | ENSG00000108947 |
|          | NM_003118    | DOWN | Hao (39)    | ENSG00000113140 |
|          | NM_000422    | DOWN | Hao (39)    | ENSG00000128422 |
|          | NM_006475    | DOWN | Hao (39)    | ENSG00000133110 |
|          | NM_006435    | DOWN | Hao (39)    | ENSG00000185201 |
|          | NM_021034    | DOWN | Hao (39)    | ENSG00000142089 |
|          | NM_003507    | DOWN | Hao (39)    | ENSG00000155760 |
|          | NM_003255    | DOWN | Hao (39)    | ENSG00000035862 |
|          | NM_005507    | DOWN | Hao (39)    | ENSG00000172757 |
|          | NM_006745    | DOWN | Hao (39)    | ENSG00000052802 |
|          | NM_002731    | DOWN | Hao (39)    | ENSG00000142875 |
|          | NM_002211    | DOWN | Hao (39)    | ENSG00000150093 |
|          | NM_000362    | DOWN | Hao (39)    | ENSG00000100234 |
|          | NM_003000    | DOWN | Hao (39)    | ENSG00000117118 |
|          | NM_001854.1  | DOWN | Suzuki (44) | ENSG00000060718 |
|          | NM_017680.1  | DOWN | Suzuki (44) | ENSG00000106819 |
|          | NM_002427.2  | DOWN | Suzuki (44) | ENSG00000137745 |
|          | NM_002421.2  | DOWN | Suzuki (44) | ENSG00000196611 |
|          | NM_002048.1  | DOWN | Suzuki (44) | ENSG00000180447 |
|          | NM_002423.2  | DOWN | Suzuki (44) | ENSG00000137673 |
|          | NM_006207.1  | DOWN | Suzuki (44) | ENSG00000104213 |
|          | NM_013989.1  | DOWN | Suzuki (44) | ENSG00000211448 |
|          | NM_004791.1  | DOWN | Suzuki (44) | ENSG00000198542 |
|          | NM_001609.1  | DOWN | Suzuki (44) | ENSG00000196177 |
|          | NM_002422.2  | DOWN | Suzuki (44) | ENSG00000149968 |

|          |             |      |                |                 |
|----------|-------------|------|----------------|-----------------|
|          | NM_001548.1 | DOWN | Suzuki (44)    | ENSG00000185745 |
|          | NM_006486.1 | DOWN | Suzuki (44)    | ENSG00000077942 |
|          | NM_000396.1 | DOWN | Suzuki (44)    | ENSG00000143387 |
|          | NM_000129.2 | DOWN | Suzuki (44)    | ENSG00000124491 |
|          | NM_014333.1 | DOWN | Suzuki (44)    | ENSG00000182985 |
|          | NM_006307.1 | DOWN | Suzuki (44)    | ENSG00000101955 |
|          | NM_004530.1 | DOWN | Suzuki (44)    | ENSG00000087245 |
|          | NM_004684.1 | DOWN | Suzuki (44)    | ENSG00000152583 |
|          | NM_002345.1 | DOWN | Suzuki (44)    | ENSG00000139329 |
|          | NM_000138.1 | DOWN | Suzuki (44)    | ENSG00000166147 |
|          | NM_004207.1 | DOWN | Suzuki (44)    | ENSG00000141526 |
|          | NM_001038.1 | DOWN | Suzuki (44)    | ENSG00000111319 |
|          | NM_006868.1 | DOWN | Suzuki (44)    | ENSG00000168461 |
|          | NM_000089.1 | DOWN | Suzuki (44)    | ENSG00000164692 |
|          | NM_014840.1 | DOWN | Suzuki (44)    | ENSG00000074590 |
|          | NM_000393.1 | DOWN | Suzuki (44)    | ENSG00000204262 |
|          | NM_012449.1 | DOWN | Suzuki (44)    | ENSG00000164647 |
|          | NM_004566.1 | DOWN | Suzuki (44)    | ENSG00000170525 |
|          | NM_019058.1 | DOWN | Suzuki (44)    | ENSG00000168209 |
|          | NM_016938.1 | DOWN | Suzuki (44)    | ENSG00000172638 |
|          | NM_015675.1 | DOWN | Suzuki (44)    | ENSG00000099860 |
|          | NM_018845.1 | DOWN | Suzuki (44)    | ENSG00000169241 |
|          | NM_004508.1 | DOWN | Suzuki (44)    | ENSG00000067064 |
|          | NM_012072.2 | DOWN | Suzuki (44)    | ENSG00000125810 |
|          | NM_000611.1 | DOWN | Suzuki (44)    | ENSG00000085063 |
|          | NM_013943.1 | DOWN | Suzuki (44)    | ENSG00000169504 |
|          | NM_018097.1 | DOWN | Suzuki (44)    | ENSG00000137814 |
|          | NM_004768.1 | DOWN | Suzuki (44)    | ENSG00000116754 |
|          | NM_004199.1 | DOWN | Suzuki (44)    | ENSG00000072682 |
|          | NM_015626.1 | DOWN | Suzuki (44)    | ENSG00000109046 |
|          | NM_000521.2 | DOWN | Suzuki (44)    | ENSG00000049860 |
|          | NM_016246.1 | DOWN | Suzuki (44)    | ENSG00000087076 |
|          | NM_006419.1 | UP   | Suzuki (44)    | ENSG00000156234 |
|          | NM_000587.1 | UP   | Suzuki (44)    | ENSG00000112936 |
|          | NM_002341.1 | UP   | Suzuki (44)    | ENSG00000227507 |
|          | NM_016459.1 | UP   | Suzuki (44)    | ENSG00000170476 |
|          | NM_003385.1 | UP   | Suzuki (44)    | ENSG00000163032 |
|          | NM_000954.1 | UP   | Suzuki (44)    | ENSG00000107317 |
|          | NM_003933.2 | UP   | Suzuki (44)    | ENSG00000007516 |
|          | NM_007286.1 | UP   | Suzuki (44)    | ENSG00000171992 |
|          | NM_003057.1 | UP   | Suzuki (44)    | ENSG00000175003 |
|          | NM_001803.1 | UP   | Suzuki (44)    | ENSG00000169442 |
|          | NM_016418.1 | UP   | Suzuki (44)    | ENSG00000186575 |
|          | NM_001536.1 | UP   | Suzuki (44)    | ENSG00000126457 |
|          | NM_003220.1 | UP   | Suzuki (44)    | ENSG00000137203 |
|          | NM_007153.1 | UP   | Suzuki (44)    | ENSG00000160321 |
|          | NM_000206.1 | UP   | Suzuki (44)    | ENSG00000147168 |
|          | NM_003604.1 | UP   | Suzuki (44)    | ENSG00000133124 |
|          | NM_003254.1 | UP   | Suzuki (44)    | ENSG00000102265 |
| ASPEN    | NM_017680   | DOWN | Ellsworth (42) | ENSG00000106819 |
| COL11A1  | NM_001854   | DOWN | Ellsworth (42) | ENSG00000060718 |
| CNIH3    | NM_152495   | DOWN | Ellsworth (42) | ENSG00000143786 |
| FST      | NM_013409   | DOWN | Ellsworth (42) | ENSG00000134363 |
| GRP      | NM_002091   | DOWN | Ellsworth (42) | ENSG00000134443 |
| KRT14    | NM_000526   | DOWN | Ellsworth (42) | ENSG00000186847 |
| KERA     | NM_007035   | DOWN | Ellsworth (42) | ENSG00000139330 |
| LRRC15   | NM_130830   | DOWN | Ellsworth (42) | ENSG00000172061 |
| MRC2     | NM_006039   | DOWN | Ellsworth (42) | ENSG00000011028 |
| MMP10    | NM_002425   | DOWN | Ellsworth (42) | ENSG00000166670 |
| MMP13    | NM_002427   | DOWN | Ellsworth (42) | ENSG00000137745 |
| MMP16    | NM_005941   | DOWN | Ellsworth (42) | ENSG00000156103 |
| MXRA5    | NM_015419   | DOWN | Ellsworth (42) | ENSG00000101825 |
| MME      | NM_000902   | DOWN | Ellsworth (42) | ENSG00000196549 |
| MFAP5    | NM_003480   | DOWN | Ellsworth (42) | ENSG00000197614 |
| NRG1     | NM_013957   | DOWN | Ellsworth (42) | ENSG00000157168 |
| OGN      | NM_014057   | DOWN | Ellsworth (42) | ENSG00000106809 |
| POSTN    | NM_007257   | DOWN | Ellsworth (42) | ENSG00000133110 |
| RBP4     | NM_006744   | DOWN | Ellsworth (42) | ENSG00000138207 |
| SCG5     | NM_003020   | DOWN | Ellsworth (42) | ENSG00000166922 |
| SPON1    | NM_006108   | DOWN | Ellsworth (42) | ENSG00000262655 |
| SPON2    | NM_012445   | DOWN | Ellsworth (42) | ENSG00000159674 |
| TAC1     | NM_003182   | DOWN | Ellsworth (42) | ENSG00000006128 |
| TNN      | NM_022093   | DOWN | Ellsworth (42) | ENSG00000120332 |
| TNFAIP6  | NM_007115   | DOWN | Ellsworth (42) | ENSG00000123610 |
| WT1      | NM_024426   | DOWN | Ellsworth (42) | ENSG00000184937 |
| WNT2     | NM_003391   | DOWN | Ellsworth (42) | ENSG00000105989 |
| ART4     | NM_021071   | UP   | Ellsworth (42) | ENSG00000111339 |
| C7       | NM_000587   | UP   | Ellsworth (42) | ENSG00000112936 |
| CCDC102B | NM_024781   | UP   | Ellsworth (42) | ENSG00000150636 |
| CCL21    | NM_002989   | UP   | Ellsworth (42) | ENSG00000137077 |
| CD79B    | NM_000626   | UP   | Ellsworth (42) | ENSG00000007312 |
| COL4A4   | NM_000092   | UP   | Ellsworth (42) | ENSG00000081052 |
| DNASE1L3 | NM_004944   | UP   | Ellsworth (42) | ENSG00000163687 |
| EPHA3    | NM_005233   | UP   | Ellsworth (42) | ENSG00000044524 |
| FOXF1    | NM_001451   | UP   | Ellsworth (42) | ENSG00000103241 |
| FOXF1    | NM_005249   | UP   | Ellsworth (42) | ENSG00000176165 |

|          |           |    |             |                 |
|----------|-----------|----|-------------|-----------------|
| CR2      | NM_001877 | UP | Vecchi (43) | ENSG00000117322 |
| P2RX5    | U49396    | UP | Vecchi (43) | ENSG00000083454 |
| EPHA3    | AF213459  | UP | Vecchi (43) | ENSG00000044524 |
| MS4A1    | AW474852  | UP | Vecchi (43) | ENSG00000156738 |
| BANK1    | NM_017935 | UP | Vecchi (43) | ENSG00000153064 |
| SLC26A7  | A1758950  | UP | Vecchi (43) | ENSG00000147606 |
| PAX5     | BF510692  | UP | Vecchi (43) | ENSG00000196092 |
| C4orf7   | A1718421  | UP | Vecchi (43) | ENSG00000181617 |
| MS4A1    | A1808597  | UP | Vecchi (43) | ENSG00000156738 |
| FCRH1    | A1572979  | UP | Vecchi (43) | ENSG00000163534 |
| T3JAM    | NM_025228 | UP | Vecchi (43) | ENSG00000009790 |
| POU2AF1  | NM_006235 | UP | Vecchi (43) | ENSG00000110777 |
| BCL11A   | NM_022893 | UP | Vecchi (43) | ENSG00000119866 |
| MS4A1    | X12530    | UP | Vecchi (43) | ENSG00000156738 |
| MS4A1    | BC002807  | UP | Vecchi (43) | ENSG00000156738 |
| GPR18    | AF261135  | UP | Vecchi (43) | ENSG00000125245 |
| C7       | NM_000587 | UP | Vecchi (43) | ENSG00000112936 |
|          | T57776    | UP | Vecchi (43) | ENSG00000111339 |
| BRDG1    | NM_012108 | UP | Vecchi (43) | ENSG00000035720 |
| CCL19    | U88321    | UP | Vecchi (43) | ENSG00000172724 |
| BCL11A   | A1912275  | UP | Vecchi (43) | ENSG00000119866 |
| TRIM     | AJ240085  | UP | Vecchi (43) | ENSG00000163519 |
| MS4A1    | A1862674  | UP | Vecchi (43) | ENSG00000156738 |
| SELL     | NM_000655 | UP | Vecchi (43) | ENSG00000188404 |
| GPR64    | NM_005756 | UP | Vecchi (43) | ENSG00000173698 |
| LRMP     | U10485    | UP | Vecchi (43) | ENSG00000118308 |
|          | AW292872  | UP | Vecchi (43) | ENSG00000271856 |
| COL4A3   | A1694562  | UP | Vecchi (43) | ENSG00000169031 |
| BCL11B   | AA918317  | UP | Vecchi (43) | ENSG00000127152 |
| IGHM     | X17115    | UP | Vecchi (43) | ENSG00000211899 |
| CDW52    | N90866    | UP | Vecchi (43) | ENSG00000169442 |
| TOSO     | A1084226  | UP | Vecchi (43) | ENSG00000162894 |
| H963     | NM_013308 | UP | Vecchi (43) | ENSG00000174946 |
| HLA-DOB  | NM_002120 | UP | Vecchi (43) | ENSG00000241106 |
| ZNFN1A1  | A1741188  | UP | Vecchi (43) | ENSG00000185811 |
| BCL11A   | NM_018014 | UP | Vecchi (43) | ENSG00000119866 |
| KIAA0746 | AB018289  | UP | Vecchi (43) | ENSG00000091490 |
| IL7R     | NM_002185 | UP | Vecchi (43) | ENSG00000168685 |
| IL7R     | BE217880  | UP | Vecchi (43) | ENSG00000168685 |
| PSCDBP   | L06633    | UP | Vecchi (43) | ENSG00000115165 |
| MEOX2    | NM_005924 | UP | Vecchi (43) | ENSG00000106511 |
| TAGAP    | AW576600  | UP | Vecchi (43) | ENSG00000164691 |
| T3JAM    | AL022398  | UP | Vecchi (43) | ENSG00000009790 |
| PTPRC    | A1809341  | UP | Vecchi (43) | ENSG00000081237 |
| PTPRC    | Y00062    | UP | Vecchi (43) | ENSG00000081237 |
| PLAC8    | NM_016619 | UP | Vecchi (43) | ENSG00000145287 |
| FCRH3    | BF514552  | UP | Vecchi (43) | ENSG00000160856 |
| ATP8A1   | A1769688  | UP | Vecchi (43) | ENSG00000124406 |
| LAMP3    | NM_014398 | UP | Vecchi (43) | ENSG00000078081 |
| CXCR4    | L01639    | UP | Vecchi (43) | ENSG00000121966 |
| SERPIN9  | BC002538  | UP | Vecchi (43) | ENSG00000170542 |
| LCK      | NM_005356 | UP | Vecchi (43) | ENSG00000182866 |
| HA-1     | BE349017  | UP | Vecchi (43) | ENSG00000180448 |
| BIRC3    | U37546    | UP | Vecchi (43) | ENSG00000023445 |
| CCR7     | NM_001838 | UP | Vecchi (43) | ENSG00000126353 |
| MMP9     | NM_004994 | UP | Vecchi (43) | ENSG00000100985 |
| CSF2RB   | AV756141  | UP | Vecchi (43) | ENSG00000100368 |
| CYFIP2   | AL161999  | UP | Vecchi (43) | ENSG00000055163 |
| LAT      | AF036906  | UP | Vecchi (43) | ENSG00000213658 |
| MST4     | NM_016542 | UP | Vecchi (43) | ENSG00000134602 |
| VCAM1    | NM_001078 | UP | Vecchi (43) | ENSG00000162692 |
| TNFAIP8  | BC005352  | UP | Vecchi (43) | ENSG00000145779 |
| RAC2     | BE138888  | UP | Vecchi (43) | ENSG00000128340 |
| RASGRP1  | NM_005739 | UP | Vecchi (43) | ENSG00000172575 |
| PRKCB1   | M13975    | UP | Vecchi (43) | ENSG00000166501 |
| CD3D     | NM_000732 | UP | Vecchi (43) | ENSG00000167286 |
| LY75     | NM_002349 | UP | Vecchi (43) | ENSG00000054219 |
| MAL      | NM_002371 | UP | Vecchi (43) | ENSG00000172005 |
| STK17B   | NM_004226 | UP | Vecchi (43) | ENSG00000081320 |
| EVI2B    | BC005926  | UP | Vecchi (43) | ENSG00000185862 |
| SLC39A10 | A1700476  | UP | Vecchi (43) | ENSG00000196950 |
| TNFAIP8  | NM_014350 | UP | Vecchi (43) | ENSG00000145779 |
| PDE3B    | NM_000753 | UP | Vecchi (43) | ENSG00000152270 |
| RAPGEF6  | NM_016340 | UP | Vecchi (43) | ENSG00000158987 |
| TAGAP    | BF591040  | UP | Vecchi (43) | ENSG00000164691 |
| CXCR4    | AJ224869  | UP | Vecchi (43) | ENSG00000121966 |
| PLCG2    | NM_002661 | UP | Vecchi (43) | ENSG00000197943 |
| FNBP1    | AB011126  | UP | Vecchi (43) | ENSG00000187239 |
| TAP2     | AA573502  | UP | Vecchi (43) | ENSG00000204267 |
| SIAT1    | A1743792  | UP | Vecchi (43) | ENSG00000073849 |
| RAPGEF6  | A1640834  | UP | Vecchi (43) | ENSG00000158987 |
| ICSBP1   | A1073984  | UP | Vecchi (43) | ENSG00000140968 |
| ETS1     | BE218980  | UP | Vecchi (43) | ENSG00000134954 |
| CENTD1   | AB011152  | UP | Vecchi (43) | ENSG00000047365 |
| PLEKHA2  | BF968578  | UP | Vecchi (43) | ENSG00000169499 |
| ITGA8    | A1193623  | UP | Vecchi (43) | ENSG00000077943 |

|               |           |      |             |                 |
|---------------|-----------|------|-------------|-----------------|
| ADRBK2        | AI651212  | UP   | Vecchi (43) | ENSG00000100077 |
| SATB1         | NM_002971 | UP   | Vecchi (43) | ENSG00000182568 |
| GLS           | NM_014905 | UP   | Vecchi (43) | ENSG00000115419 |
| CD53          | NM_000560 | UP   | Vecchi (43) | ENSG00000143119 |
| BLNK          | NM_013314 | UP   | Vecchi (43) | ENSG00000095585 |
| TCF3          | M31523    | UP   | Vecchi (43) | ENSG00000071564 |
| AP1GBP1       | AI472320  | UP   | Vecchi (43) | ENSG00000275066 |
| TNFAIP3       | NM_006290 | UP   | Vecchi (43) | ENSG00000118503 |
| FLJ10652      | NM_018169 | UP   | Vecchi (43) | ENSG00000174718 |
| CD83          | NM_004233 | UP   | Vecchi (43) | ENSG00000112149 |
| LOC64744      | AL137764  | UP   | Vecchi (43) | ENSG00000084070 |
| SNARK         | NM_030952 | UP   | Vecchi (43) | ENSG00000163545 |
| FCHSD2        | NM_014824 | UP   | Vecchi (43) | ENSG00000137478 |
| CD48          | NM_001778 | UP   | Vecchi (43) | ENSG00000117091 |
| ARHGGEF18     | AB011093  | UP   | Vecchi (43) | ENSG00000104880 |
| FLJ22570      | BC004564  | UP   | Vecchi (43) | ENSG00000146094 |
| ZBTB24        | NM_014797 | UP   | Vecchi (43) | ENSG00000112365 |
| CSK           | NM_004383 | UP   | Vecchi (43) | ENSG00000103653 |
| LPXN          | X77598    | UP   | Vecchi (43) | ENSG00000110031 |
| MBNL1         | NM_021038 | UP   | Vecchi (43) | ENSG00000152601 |
| AKAP2         | NM_007203 | UP   | Vecchi (43) | ENSG00000241978 |
| MBNL1         | N31913    | UP   | Vecchi (43) | ENSG00000152601 |
| TP73L         | AF091627  | DOWN | Vecchi (43) | ENSG00000073282 |
| MRC2          | AB014609  | DOWN | Vecchi (43) | ENSG00000011028 |
| ANXA1         | NM_000700 | DOWN | Vecchi (43) | ENSG00000135046 |
| COL3A1        | AU144167  | DOWN | Vecchi (43) | ENSG00000168542 |
| FOXF2         | NM_001452 | DOWN | Vecchi (43) | ENSG00000137273 |
| CDH11         | D21254    | DOWN | Vecchi (43) | ENSG00000140937 |
| SPON2         | NM_012445 | DOWN | Vecchi (43) | ENSG00000159674 |
| LGALS3        | BC001120  | DOWN | Vecchi (43) | ENSG00000131981 |
| DKFZP434B044  | AL136861  | DOWN | Vecchi (43) | ENSG00000103196 |
| COL5A1        | A1130969  | DOWN | Vecchi (43) | ENSG00000130635 |
| IGFBP3        | M31159    | DOWN | Vecchi (43) | ENSG00000146674 |
| FBXO32        | N21643    | DOWN | Vecchi (43) | ENSG00000156804 |
| SPARC         | NM_003118 | DOWN | Vecchi (43) | ENSG00000113140 |
| TAGLN         | NM_003186 | DOWN | Vecchi (43) | ENSG00000149591 |
| FOXK2         | AV763408  | DOWN | Vecchi (43) | ENSG00000141568 |
| PLXDC2        | AI420817  | DOWN | Vecchi (43) | ENSG00000120594 |
| PLS3          | NM_005032 | DOWN | Vecchi (43) | ENSG00000102024 |
| ACTA2         | NM_001613 | DOWN | Vecchi (43) | ENSG00000107796 |
| SPARCL1       | NM_004684 | DOWN | Vecchi (43) | ENSG00000152585 |
| TAZ           | BF674349  | DOWN | Vecchi (43) | ENSG00000102125 |
| COL1A2        | AA788711  | DOWN | Vecchi (43) | ENSG00000164692 |
| GEM           | NM_005261 | DOWN | Vecchi (43) | ENSG00000164949 |
| NOX4          | NM_016931 | DOWN | Vecchi (43) | ENSG00000086991 |
| GPNMB         | NM_002510 | DOWN | Vecchi (43) | ENSG00000136235 |
| NNMT          | NM_006169 | DOWN | Vecchi (43) | ENSG00000166741 |
| OLFML3        | NM_020190 | DOWN | Vecchi (43) | ENSG00000116774 |
| SDC1          | Z48199    | DOWN | Vecchi (43) | ENSG00000115884 |
| GULP1         | AF200715  | DOWN | Vecchi (43) | ENSG00000144366 |
| PTN           | M57399    | DOWN | Vecchi (43) | ENSG00000105894 |
| SPON1         | AB018305  | DOWN | Vecchi (43) | ENSG00000262655 |
| GAS1          | NM_002048 | DOWN | Vecchi (43) | ENSG00000180447 |
| GREM1         | NM_013372 | DOWN | Vecchi (43) | ENSG00000166923 |
| C4A           | K02403    | DOWN | Vecchi (43) | ENSG00000244731 |
| GPM6B         | AF016004  | DOWN | Vecchi (43) | ENSG00000046653 |
| COL6A1        | AA292373  | DOWN | Vecchi (43) | ENSG00000142156 |
| COL1A2        | NM_000089 | DOWN | Vecchi (43) | ENSG00000164692 |
| SNAI2         | AI572079  | DOWN | Vecchi (43) | ENSG00000019549 |
| COL3A1        | AI813758  | DOWN | Vecchi (43) | ENSG00000168542 |
| TWIST1        | X99268    | DOWN | Vecchi (43) | ENSG00000122691 |
| PCDH18        | AW189885  | DOWN | Vecchi (43) | ENSG00000189184 |
| LRRC15        | AU147799  | DOWN | Vecchi (43) | ENSG00000172061 |
| LUM           | NM_002345 | DOWN | Vecchi (43) | ENSG00000139329 |
| CLDN11        | AW264204  | DOWN | Vecchi (43) | ENSG00000013297 |
| ADAM12        | NM_003474 | DOWN | Vecchi (43) | ENSG00000148848 |
| SPP1          | M83248    | DOWN | Vecchi (43) | ENSG00000118785 |
| F13A1         | NM_000129 | DOWN | Vecchi (43) | ENSG00000124491 |
| COL5A2        | AL575735  | DOWN | Vecchi (43) | ENSG00000204262 |
| LOC253827     | AW027333  | DOWN | Vecchi (43) | ENSG00000174099 |
| DCN           | AI281593  | DOWN | Vecchi (43) | ENSG00000011465 |
| DKFZp564i1922 | AF245505  | DOWN | Vecchi (43) | ENSG00000101825 |
| COL1A1        | K01228    | DOWN | Vecchi (43) | ENSG00000108821 |
| CSPG2         | NM_004385 | DOWN | Vecchi (43) | ENSG00000038427 |
| THBS2         | NM_003247 | DOWN | Vecchi (43) | ENSG00000186340 |
| KIT           | NM_000222 | DOWN | Vecchi (43) | ENSG00000157404 |
| PGDS          | NM_014485 | DOWN | Vecchi (43) | ENSG00000163106 |
| COL5A2        | NM_000393 | DOWN | Vecchi (43) | ENSG00000204262 |
| OMD           | AI765819  | DOWN | Vecchi (43) | ENSG00000127083 |
| URB           | AW303375  | DOWN | Vecchi (43) | ENSG0000009198  |
| FBLN1         | NM_006486 | DOWN | Vecchi (43) | ENSG00000077942 |
| FN1           | BC005858  | DOWN | Vecchi (43) | ENSG00000115414 |
| CTGF          | M92934    | DOWN | Vecchi (43) | ENSG00000118523 |
| DCN           | AF138300  | DOWN | Vecchi (43) | ENSG00000011465 |
| AKR1C3        | AB018580  | DOWN | Vecchi (43) | ENSG00000196139 |
| LUM           | AI141861  | DOWN | Vecchi (43) | ENSG00000139329 |

|           |           |      |             |                 |
|-----------|-----------|------|-------------|-----------------|
| FN1       | X02761    | DOWN | Vecchi (43) | ENSG00000115414 |
| LOC387758 | A1802391  | DOWN | Vecchi (43) | ENSG00000176971 |
| SGNE1     | NM_003020 | DOWN | Vecchi (43) | ENSG00000166922 |
| STEAP     | NM_012449 | DOWN | Vecchi (43) | ENSG00000164647 |
| RBP7      | A1733027  | DOWN | Vecchi (43) | ENSG00000162444 |
| FN1       | AF130095  | DOWN | Vecchi (43) | ENSG00000115414 |
| MMP2      | NM_004530 | DOWN | Vecchi (43) | ENSG00000087245 |
| FN1       | AK026737  | DOWN | Vecchi (43) | ENSG00000115414 |
| DCN       | AF138303  | DOWN | Vecchi (43) | ENSG00000011465 |
| DCN       | AF138302  | DOWN | Vecchi (43) | ENSG00000011465 |
| PRSS11    | NM_002775 | DOWN | Vecchi (43) | ENSG00000166033 |
| SPON1     | A1885290  | DOWN | Vecchi (43) | ENSG00000262655 |
| ETV1      | BE881590  | DOWN | Vecchi (43) | ENSG00000006468 |
| GULP1     | NM_016315 | DOWN | Vecchi (43) | ENSG00000144366 |
| MGP       | NM_000900 | DOWN | Vecchi (43) | ENSG00000111341 |
| FMO1      | NM_002021 | DOWN | Vecchi (43) | ENSG00000010932 |
| CSPG2     | BF590263  | DOWN | Vecchi (43) | ENSG00000038427 |
| MFAP5     | U37283    | DOWN | Vecchi (43) | ENSG00000197614 |
| CTHRC1    | AA584310  | DOWN | Vecchi (43) | ENSG00000164932 |
| LRRC17    | NM_005824 | DOWN | Vecchi (43) | ENSG00000128606 |
| GPM6B     | A1419030  | DOWN | Vecchi (43) | ENSG00000046653 |
| CHI3L1    | M80927    | DOWN | Vecchi (43) | ENSG00000133048 |
| OMD       | NM_005014 | DOWN | Vecchi (43) | ENSG00000127083 |
| CTSK      | NM_000396 | DOWN | Vecchi (43) | ENSG00000143387 |
| EDIL3     | AA053711  | DOWN | Vecchi (43) | ENSG00000164176 |
| CPA3      | NM_001870 | DOWN | Vecchi (43) | ENSG00000163751 |
| DIQ2      | NM_013989 | DOWN | Vecchi (43) | ENSG00000211448 |
| PTN       | AL565812  | DOWN | Vecchi (43) | ENSG00000105894 |
| IRX2      | A1928035  | DOWN | Vecchi (43) | ENSG00000170561 |
| TNFAIP6   | AW188198  | DOWN | Vecchi (43) | ENSG00000123610 |
| WNT2      | NM_003391 | DOWN | Vecchi (43) | ENSG00000105989 |
| VSNL1     | AF039555  | DOWN | Vecchi (43) | ENSG00000163032 |
| FST       | NM_013409 | DOWN | Vecchi (43) | ENSG00000134363 |
| COL1A2    | AA628535  | DOWN | Vecchi (43) | ENSG00000164692 |
| MFAP5     | AW665892  | DOWN | Vecchi (43) | ENSG00000197614 |
| LOC83690  | AF142573  | DOWN | Vecchi (43) | ENSG00000121005 |
| TNFAIP6   | NM_007115 | DOWN | Vecchi (43) | ENSG00000123610 |
| TNN       | BF432086  | DOWN | Vecchi (43) | ENSG00000120332 |
| DIQ2      | U53506    | DOWN | Vecchi (43) | ENSG00000211448 |
| C20orf82  | A1816793  | DOWN | Vecchi (43) | ENSG00000101230 |
| LOC83468  | W63754    | DOWN | Vecchi (43) | ENSG00000120820 |
| MAP3K4    | A1633559  | DOWN | Vecchi (43) | ENSG00000085511 |
| PIP       | NM_002652 | DOWN | Vecchi (43) | ENSG00000159763 |
| ALDH1A3   | NM_000693 | DOWN | Vecchi (43) | ENSG00000184254 |
| FBLN1     | Z95331    | DOWN | Vecchi (43) | ENSG00000077942 |
| COL3A1    | AU146808  | DOWN | Vecchi (43) | ENSG00000168542 |
| ASPEN     | NM_017680 | DOWN | Vecchi (43) | ENSG00000106819 |
| PTN       | BC005916  | DOWN | Vecchi (43) | ENSG00000105894 |
| ITGBL1    | AL359052  | DOWN | Vecchi (43) | ENSG00000198542 |
| PDGFRL    | NM_006207 | DOWN | Vecchi (43) | ENSG00000104213 |
| ODZ2      | AB032953  | DOWN | Vecchi (43) | ENSG00000145934 |
| APOD      | NM_001647 | DOWN | Vecchi (43) | ENSG00000189058 |
| POSTN     | D13665    | DOWN | Vecchi (43) | ENSG00000133110 |
| DIQ2      | A1038059  | DOWN | Vecchi (43) | ENSG00000211448 |
| MMP7      | NM_002423 | DOWN | Vecchi (43) | ENSG00000137673 |
| S100A2    | NM_005978 | DOWN | Vecchi (43) | ENSG00000196754 |
| KRT6B     | A1831452  | DOWN | Vecchi (43) | ENSG00000185479 |
| FIBL-6    | BF446673  | DOWN | Vecchi (43) | ENSG00000143341 |
| FAP       | U76833    | DOWN | Vecchi (43) | ENSG00000078098 |
| OGN       | AV700059  | DOWN | Vecchi (43) | ENSG00000106809 |
| ITGBL1    | NM_004791 | DOWN | Vecchi (43) | ENSG00000198542 |
| MME       | A1433463  | DOWN | Vecchi (43) | ENSG00000196549 |
| LTF       | NM_002343 | DOWN | Vecchi (43) | ENSG00000012223 |
| SERPINB5  | NM_002639 | DOWN | Vecchi (43) | ENSG00000206075 |
| TAC1      | NM_003182 | DOWN | Vecchi (43) | ENSG00000006128 |
| CHI3L1    | M80927    | DOWN | Vecchi (43) | ENSG00000133048 |
| COL11A1   | NM_001854 | DOWN | Vecchi (43) | ENSG00000060718 |
| FST       | BF438173  | DOWN | Vecchi (43) | ENSG00000134363 |
| SFRP2     | AF311912  | DOWN | Vecchi (43) | ENSG00000145423 |
| DST       | NM_001723 | DOWN | Vecchi (43) | ENSG00000151914 |
| COL11A1   | J04177    | DOWN | Vecchi (43) | ENSG00000060718 |
| MMP3      | NM_002422 | DOWN | Vecchi (43) | ENSG00000149968 |
| F2RL2     | A1378647  | DOWN | Vecchi (43) | ENSG00000164220 |
| SFRP2     | AW003584  | DOWN | Vecchi (43) | ENSG00000145423 |
| KRT14     | BC002690  | DOWN | Vecchi (43) | ENSG00000186847 |
