# Supplementary material for: Molecular patterns of cancer colonisation in lymph nodes of breast cancer patients
Source: PubMed Central journal article supplement (PMC6247766; doi:10.1186/s13058-018-1070-3), 2018-11-20
Supplement: 13058_2018_1070_MOESM2_ESM.pdf [file 13058_2018_1070_MOESM2_ESM.pdf]

| HGNC gene symbol     | ensembl gene id  | Number of studies | Up or down regulated   |
|----------------------|------------------|-------------------|------------------------|
| COL11A1              | ENSG00000060718  | 4                 | DOWN, DOWN, DOWN, DOWN |
| ASPEN                | ENSG00000106819  | 4                 | DOWN, DOWN, DOWN, DOWN |
| C7                   | ENSG00000112936  | 4                 | UP, UP, UP, UP         |
| POSTN, OSF-2         | ENSG00000133110  | 4                 | DOWN, DOWN, DOWN, DOWN |
| LUM                  | ENSG00000139329  | 4                 | UP, DOWN, DOWN, DOWN   |
| MRC2                 | ENSG0000011028   | 3                 | DOWN, DOWN, DOWN       |
| SNAI2                | ENSG0000019549   | 3                 | DOWN, DOWN, DOWN       |
| EPHA3                | ENSG00000044524  | 3                 | DOWN, UP, UP           |
| FBLN1                | ENSG00000077942  | 3                 | DOWN, DOWN, DOWN       |
| MMP2                 | ENSG00000087245  | 3                 | DOWN, DOWN, DOWN       |
| PDGFRL               | ENSG00000104213  | 3                 | DOWN, DOWN, DOWN       |
| OGN                  | ENSG00000106809  | 3                 | DOWN, DOWN, DOWN       |
| SPARC                | ENSG00000113140  | 3                 | DOWN, DOWN, DOWN       |
| TNFAIP6              | ENSG00000123610  | 3                 | DOWN, DOWN, DOWN       |
| F13A1                | ENSG00000124491  | 3                 | DOWN, DOWN, DOWN       |
| GPNMB                | ENSG00000136235  | 3                 | UP, DOWN, DOWN         |
| MMP7                 | ENSG00000137673  | 3                 | DOWN, DOWN, DOWN       |
| CTSK                 | ENSG00000143387  | 3                 | DOWN, DOWN, DOWN       |
| STEAP                | ENSG00000164647  | 3                 | DOWN, DOWN, DOWN       |
| COL1A2               | ENSG00000164692  | 3                 | DOWN, DOWN, DOWN       |
| HTRA1, PRSS11        | ENSG00000166033  | 3                 | UP, DOWN, DOWN         |
| GAS1                 | ENSG00000180447  | 3                 | DOWN, DOWN, DOWN       |
| KRT14                | ENSG00000186847  | 3                 | DOWN, DOWN, DOWN       |
| MME                  | ENSG00000196549  | 3                 | DOWN, DOWN, DOWN       |
| ITGBL1               | ENSG00000198542  | 3                 | DOWN, DOWN, DOWN       |
| COL5A2               | ENSG00000204262  | 3                 | DOWN, DOWN, DOWN       |
| DIO2                 | ENSG00000211448  | 3                 | DOWN, DOWN, DOWN       |
| SPON1                | ENSG00000262655  | 3                 | DOWN, DOWN, DOWN       |
| TAC1                 | ENSG00000006128  | 2                 | DOWN, DOWN             |
| FMO1                 | ENSG00000010932  | 2                 | DOWN, DOWN             |
| DCN                  | ENSG00000011465  | 2                 | DOWN, DOWN             |
| BIRC3                | ENSG00000023445  | 2                 | UP, UP                 |
| CSPG2                | ENSG00000038427  | 2                 | DOWN, DOWN             |
| PTPRC                | ENSG000000081237 | 2                 | DOWN, UP               |
| LGALS1               | ENSG00000100097  | 2                 | UP, DOWN               |
| TIMP3                | ENSG00000100234  | 2                 | UP, DOWN               |
| MXRA5, DKFZp564l1922 | ENSG00000101825  | 2                 | DOWN, DOWN             |
| PLS3                 | ENSG00000102024  | 2                 | UP, DOWN               |
| TIMP1                | ENSG00000102265  | 2                 | UP, UP                 |
| PTN                  | ENSG00000105894  | 2                 | DOWN, DOWN             |
| WNT2                 | ENSG00000105989  | 2                 | DOWN, DOWN             |
| ART4                 | ENSG00000111339  | 2                 | UP, UP                 |
| FN1                  | ENSG00000115414  | 2                 | DOWN, DOWN             |
| SDC1                 | ENSG00000115884  | 2                 | UP, DOWN               |
| SFRS11               | ENSG00000116754  | 2                 | DOWN, DOWN             |
| CD48                 | ENSG00000117091  | 2                 | DOWN, UP               |
| CR2                  | ENSG00000117322  | 2                 | DOWN, UP               |
| TNFAIP3              | ENSG00000118503  | 2                 | UP, UP                 |
| TNN                  | ENSG00000120332  | 2                 | DOWN, DOWN             |
| OMD                  | ENSG00000127083  | 2                 | DOWN, DOWN             |
| KRT17                | ENSG00000128422  | 2                 | DOWN, DOWN             |
| CALU                 | ENSG00000128595  | 2                 | DOWN, DOWN             |
| COL5A1               | ENSG00000130635  | 2                 | DOWN, DOWN             |
| CHI3L1               | ENSG00000133048  | 2                 | DOWN, DOWN             |
| FST                  | ENSG00000134363  | 2                 | DOWN, DOWN             |
| GRP                  | ENSG00000134443  | 2                 | DOWN, DOWN             |
| MMP13                | ENSG00000137745  | 2                 | DOWN, DOWN             |
| COL6A1               | ENSG00000142156  | 2                 | DOWN, DOWN             |
| GULP1                | ENSG00000144366  | 2                 | DOWN, DOWN             |
| SFRP2                | ENSG00000145423  | 2                 | DOWN, DOWN             |
| IGFBP3               | ENSG00000146674  | 2                 | DOWN, DOWN             |
| MMP3                 | ENSG00000149968  | 2                 | DOWN, DOWN             |
| DST                  | ENSG00000151914  | 2                 | DOWN, DOWN             |
| ZFP36L2              | ENSG00000152518  | 2                 | UP, UP                 |
| SPARCL1              | ENSG00000152583  | 2                 | DOWN, DOWN             |
| MBNL1                | ENSG00000152601  | 2                 | UP, UP                 |
| MS4A1                | ENSG00000156738  | 2                 | UP, UP                 |
| SPON2                | ENSG00000159674  | 2                 | DOWN, DOWN             |
| VSNL1                | ENSG00000163032  | 2                 | UP, DOWN               |
| CPA3                 | ENSG00000163751  | 2                 | DOWN, DOWN             |
| F2RL2                | ENSG00000164220  | 2                 | DOWN, DOWN             |
| CTHRC1               | ENSG00000164932  | 2                 | DOWN, DOWN             |
| FBN1                 | ENSG00000166147  | 2                 | DOWN, DOWN             |
| MMP10                | ENSG00000166670  | 2                 | DOWN, DOWN             |
| SCG5, SGNE1          | ENSG00000166922  | 2                 | DOWN, DOWN             |
| GREM1                | ENSG00000166923  | 2                 | DOWN, DOWN             |
| COL3A1               | ENSG00000168542  | 2                 | DOWN, DOWN             |
| CDW52                | ENSG00000169442  | 2                 | UP, UP                 |
| LRRC15               | ENSG00000172061  | 2                 | DOWN, DOWN             |
| CCL19                | ENSG00000172724  | 2                 | UP, UP                 |
| KRT6B                | ENSG00000185479  | 2                 | DOWN, DOWN             |
| SELL                 | ENSG00000188404  | 2                 | UP, UP                 |
| APOD                 | ENSG00000189058  | 2                 | DOWN, DOWN             |
| MMP1                 | ENSG00000196611  | 2                 | DOWN, DOWN             |
| S100A2               | ENSG00000196754  | 2                 | DOWN, DOWN             |
| MFAP5                | ENSG00000197614  | 2                 | DOWN, DOWN             |
| LTB                  | ENSG00000227507  | 2                 | UP, UP                 |
| TXNIP                | ENSG00000265972  | 2                 | DOWN, DOWN             |
