# Supplementary material for: Molecular patterns of cancer colonisation in lymph nodes of breast cancer patients
Source: PubMed Central journal article supplement (PMC6247766; doi:10.1186/s13058-018-1070-3), 2018-11-20
Supplement: 13058_2018_1070_MOESM3_ESM.pdf [file 13058_2018_1070_MOESM3_ESM.pdf]

| Ensembl ID      | Gene Name | Scenario 1 | Scenario 2 | Scenario 3 | Scenario 4 | Scenario 5 | Scenario 6 |
|-----------------|-----------|------------|------------|------------|------------|------------|------------|
| ENSG00000189058 | APOD      | D          | D          |            |            |            |            |
| ENSG00000186081 | KRT5      | D          |            |            |            |            |            |
| ENSG00000167244 | IGF2      | D          |            |            |            |            |            |
| ENSG00000137699 | TRIM29    | D          |            |            |            |            |            |
| ENSG00000169429 | CXCL8     | D          |            |            |            |            |            |
| ENSG00000077942 | FBLN1     | D          |            |            |            |            |            |
| ENSG00000265190 | ANXA8     | D          |            |            |            |            |            |
| ENSG00000124491 | F13A1     | D          |            |            |            |            |            |
| ENSG00000196549 | MME       | D          | D          |            |            |            |            |
| ENSG00000211448 | DIO2      | D          |            |            |            |            |            |
| ENSG00000089472 | HEPH      | D          |            |            |            |            |            |
| ENSG00000164120 | HPGD      | D          |            |            |            |            |            |
| ENSG00000144366 | GULP1     | D          |            |            |            |            |            |
| ENSG00000196754 | S100A2    | D          |            |            |            |            |            |
| ENSG00000151914 | DST       | D          |            |            |            |            |            |
| ENSG00000180447 | GAS1      | D          |            |            |            |            |            |
| ENSG00000196611 | MMP1      | D          |            |            |            |            |            |
| ENSG00000155659 | VSIG4     | D          |            |            |            |            |            |
| ENSG00000094755 | GABRP     | D          |            |            |            |            |            |
| ENSG00000128422 | KRT17     | D          |            |            |            |            |            |
| ENSG00000163751 | CPA3      | D          |            |            |            |            |            |
| ENSG00000166670 | MMP10     | D          |            |            |            |            |            |
| ENSG00000127083 | OMD       | D          | D          |            |            |            |            |
| ENSG00000083782 | EPYC      | D          |            |            |            |            |            |
| ENSG00000164220 | F2RL2     | D          | D          |            |            |            |            |
| ENSG00000184408 | KCND2     | D          |            |            |            |            |            |
| ENSG00000117586 | TNFSF4    | D          |            |            |            |            |            |
| ENSG00000011465 | DCN       | D          | D          |            |            |            |            |
| ENSG00000133048 | CHI3L1    | D          |            |            |            |            |            |
| ENSG00000105894 | PTN       | D          | D          |            |            |            |            |
| ENSG00000178363 | CALML3    | D          |            |            |            |            |            |
| ENSG00000146674 | IGFBP3    | D          |            |            |            |            |            |
| ENSG00000019549 | SNAI2     | D          |            |            |            |            |            |
| ENSG00000153707 | PTPRD     | D          |            |            |            |            |            |
| ENSG00000106236 | NPTX2     | D          |            |            |            |            |            |
| ENSG00000185479 | KRT6B     | D          |            |            |            |            |            |
| ENSG00000101134 | DOK5      | D          |            |            |            |            |            |
| ENSG00000166923 | GREM1     | D          |            |            |            |            |            |
| ENSG00000198759 | EGFL6     | D          |            |            |            |            |            |
| ENSG00000162493 | PDPN      | D          |            |            |            |            |            |
| ENSG00000044524 | EPHA3     | U          |            |            |            |            |            |
| ENSG00000135914 | HTR2B     | D          |            |            |            |            |            |
| ENSG00000158477 | CD1A      | D          |            |            |            |            |            |
| ENSG00000155011 | DKK2      | D          |            |            |            |            |            |
| ENSG00000204580 | DDR1      | D          |            |            |            |            |            |
| ENSG00000271503 | CCL5      | D          |            |            |            |            |            |
| ENSG00000182580 | EPHB3     | D          |            |            |            |            |            |
| ENSG00000255974 | CYP2A6    | D          |            |            |            |            | U          |
| ENSG00000157227 | MMP14     | D          |            |            |            |            |            |
| ENSG00000174231 | PRPF8     | D          |            |            |            |            |            |
| ENSG00000100353 | EIF3D     | D          |            |            |            |            |            |
| ENSG00000117410 | ATP6V0B   | D          |            |            |            |            |            |
| ENSG00000147065 | MSN       | D          |            |            |            |            |            |
| ENSG00000096696 | DSP       | D          |            |            |            |            |            |
| ENSG00000142949 | PTPRF     | D          |            |            |            |            |            |
| ENSG00000163191 | S100A11   | D          |            |            |            |            |            |
| ENSG00000113140 | SPARC     | D          |            |            |            |            |            |
| ENSG00000100219 | XBP1      | D          |            |            |            |            |            |
| ENSG00000115306 | SPTBN1    | D          |            |            |            |            |            |
| ENSG00000116754 | SRSF11    | D          |            |            |            |            |            |
| ENSG00000136240 | KDEL2     | D          |            |            |            |            |            |
| ENSG00000113558 | SKP1      | D          |            |            |            |            |            |
| ENSG00000128595 | CALU      | D          |            |            |            |            |            |
| ENSG00000144746 | ARL6IP5   | D          |            |            |            |            |            |
| ENSG00000044115 | CTNNA1    | D          |            |            |            |            |            |
| ENSG00000117984 | CTSD      | D          |            |            |            |            |            |
| ENSG00000115758 | ODC1      | D          |            |            |            |            |            |
| ENSG00000204389 | HSPA1A    | D          |            |            |            |            |            |
| ENSG00000083444 | PLOD1     | D          |            |            |            |            |            |
| ENSG00000099194 | SCD       | D          |            |            |            |            |            |
| ENSG00000116133 | DHCR24    | D          |            |            |            |            |            |
| ENSG00000166165 | CKB       | D          |            |            |            |            |            |
| ENSG00000155367 | PPM1J     | D          |            |            |            |            |            |
| ENSG00000004478 | FKBP4     | D          |            |            |            |            |            |
| ENSG00000129116 | PALLD     | D          |            |            |            |            |            |
| ENSG00000198408 | MGEA5     | D          |            |            |            |            |            |
| ENSG00000204592 | HLA-E     | D          |            |            |            |            |            |
| ENSG00000147526 | TACC1     | D          |            |            |            |            |            |
| ENSG00000133639 | BTG1      | D          |            |            |            |            |            |
| ENSG00000108679 | LGALS3BP  | D          |            |            |            |            |            |
| ENSG00000230989 | HSBP1     | D          |            |            |            |            |            |
| ENSG00000118971 | CCND2     | D          |            |            |            |            |            |
| ENSG00000204634 | TBC1D8    | D          |            |            |            |            |            |
| ENSG00000099204 | ABLIM1    | D          |            |            |            |            |            |
| ENSG00000197043 | ANXA6     | D          |            |            |            |            |            |
| ENSG00000136026 | CKAP4     | D          |            |            |            |            |            |
| ENSG00000010278 | CD9       | D          |            |            |            |            |            |
| ENSG00000265972 | TXNIP     | D          |            |            |            |            |            |
| ENSG00000173801 | JUP       | D          |            |            |            |            |            |
| ENSG00000125868 | DSTN      | D          |            |            |            |            |            |

|                 |          |   |  |   |   |  |
|-----------------|----------|---|--|---|---|--|
| ENSG00000111716 | LDHB     | U |  |   |   |  |
| ENSG00000148700 | ADD3     | U |  |   |   |  |
| ENSG00000085733 | CTTN     | U |  |   |   |  |
| ENSG00000100097 | LGALS1   | B |  |   |   |  |
| ENSG00000137801 | THBS1    | U |  |   |   |  |
| ENSG00000082781 | ITGB5    | U |  |   | U |  |
| ENSG00000039068 | CDH1     | U |  |   |   |  |
| ENSG00000223865 | HLA-DPB1 | U |  |   |   |  |
| ENSG00000136235 | GPNMB    | D |  |   |   |  |
| ENSG00000100234 | TIMP3    | B |  |   |   |  |
| ENSG00000152601 | MBNL1    | U |  |   |   |  |
| ENSG00000166033 | HTRA1    | D |  |   |   |  |
| ENSG00000215301 | DDX3X    | U |  |   |   |  |
| ENSG00000102024 | PLS3     | B |  |   |   |  |
| ENSG00000175029 | CTBP2    | U |  |   |   |  |
| ENSG00000019995 | ZRANB1   | U |  |   |   |  |
| ENSG00000143153 | ATP1B1   | U |  |   |   |  |
| ENSG00000008282 | SYPL1    | U |  |   |   |  |
| ENSG00000182492 | BGN      | U |  |   |   |  |
| ENSG00000115884 | SDC1     | B |  |   |   |  |
| ENSG00000111348 | ARHGDIB  | U |  |   |   |  |
| ENSG00000142871 | CYR61    | U |  | U |   |  |
| ENSG00000114978 | MOB1A    | U |  |   |   |  |
| ENSG00000136938 | ANP32B   | U |  |   |   |  |
| ENSG00000134986 | NREP     | U |  |   |   |  |
| ENSG00000134531 | EMP1     | U |  |   |   |  |
| ENSG00000157557 | ETS2     | U |  |   |   |  |
| ENSG00000171617 | ENC1     | U |  |   |   |  |
| ENSG00000109062 | SLC9A3R1 | U |  |   |   |  |
| ENSG00000152518 | ZFP36L2  | U |  |   |   |  |
| ENSG00000154277 | UCHL1    | U |  |   |   |  |
| ENSG00000173020 | GRK2     | U |  |   |   |  |
| ENSG00000143198 | MGST3    | U |  |   |   |  |
| ENSG00000124766 | SOX4     | U |  |   |   |  |
| ENSG00000189143 | CLDN4    | U |  |   |   |  |
| ENSG00000113657 | DPYSL3   | U |  |   |   |  |
| ENSG00000163359 | COL6A3   | U |  |   |   |  |
| ENSG00000181019 | NQO1     | U |  |   |   |  |
| ENSG00000109861 | CTSC     | U |  |   |   |  |
| ENSG00000137509 | PRCP     | U |  |   |   |  |
| ENSG00000091136 | LAMB1    | U |  |   |   |  |
| ENSG00000141753 | IGFBP4   | U |  |   |   |  |
| ENSG00000163435 | ELF3     | U |  |   |   |  |
| ENSG00000132383 | RPA1     | U |  |   |   |  |
| ENSG00000022267 | FHL1     | U |  | D |   |  |
| ENSG00000079332 | SAR1A    | U |  |   |   |  |
| ENSG00000117139 | KDM5B    | U |  |   |   |  |
| ENSG00000140263 | SORD     | U |  |   |   |  |
| ENSG00000075618 | FSCN1    | U |  |   |   |  |
| ENSG00000239672 | NME1     | U |  |   |   |  |
| ENSG00000083857 | FAT1     | U |  |   |   |  |
| ENSG00000182718 | ANXA2    | U |  |   |   |  |
| ENSG00000111057 | KRT18    | U |  |   |   |  |
| ENSG00000064666 | CNN2     | U |  |   |   |  |
| ENSG00000158747 | NBL1     | U |  |   |   |  |
| ENSG00000137331 | IER3     | U |  |   |   |  |
| ENSG00000162437 | RAVER2   | U |  |   |   |  |
| ENSG00000171345 | KRT19    | U |  |   | U |  |
| ENSG00000123983 | ACSL3    | U |  |   |   |  |
| ENSG00000102265 | TIMP1    | U |  |   |   |  |
| ENSG00000152661 | GJA1     | U |  |   |   |  |
| ENSG00000151208 | DLG5     | U |  |   |   |  |
| ENSG00000076554 | TPD52    | U |  |   |   |  |
| ENSG00000112576 | CCND3    | U |  |   |   |  |
| ENSG00000197586 | ENTPD6   | U |  |   |   |  |
| ENSG00000131462 | TUBG1    | U |  |   |   |  |
| ENSG00000079819 | EPB41L2  | U |  |   |   |  |
| ENSG00000162511 | LAPTM5   | U |  |   |   |  |
| ENSG00000139329 | LUM      | D |  |   |   |  |
| ENSG00000151239 | TWF1     | U |  |   |   |  |
| ENSG00000164919 | COX6C    | U |  |   |   |  |
| ENSG00000100297 | MCM5     | U |  |   |   |  |
| ENSG00000134291 | TMEM106C | U |  |   |   |  |
| ENSG00000110711 | AIP      | U |  |   |   |  |
| ENSG00000172893 | DHCR7    | U |  |   |   |  |
| ENSG00000106624 | AEBP1    | U |  |   |   |  |
| ENSG00000143815 | LBR      | U |  |   |   |  |
| ENSG00000138119 | MYOF     | U |  |   |   |  |
| ENSG00000131370 | SH3BP5   | U |  |   |   |  |
| ENSG00000196683 | TOMM7    | U |  |   |   |  |
| ENSG00000134375 | TIMM17A  | U |  |   |   |  |
| ENSG00000013561 | RNF14    | U |  |   |   |  |
| ENSG00000143653 | SCCPDH   | U |  |   |   |  |
| ENSG00000119888 | EPCAM    | U |  |   | U |  |
| ENSG00000106211 | HSPB1    | U |  |   |   |  |
| ENSG00000115380 | EFEMP1   | U |  |   |   |  |
| ENSG00000176171 | BNIP3    | U |  |   |   |  |
| ENSG00000145423 | SFRP2    | D |  | D |   |  |
| ENSG00000060718 | COL11A1  | D |  |   |   |  |
| ENSG00000104213 | PDGFRL   | D |  |   |   |  |
| ENSG00000087245 | MMP2     | D |  |   |   |  |

|                 |         |   |   |   |   |   |
|-----------------|---------|---|---|---|---|---|
| ENSG00000143387 | CTSK    | D |   |   |   |   |
| ENSG00000137673 | MMP7    | D |   |   |   |   |
| ENSG00000106819 | ASPN    | D |   |   |   |   |
| ENSG00000198542 | ITGBL1  | D |   |   |   |   |
| ENSG00000133110 | POSTN   | D |   |   |   |   |
| ENSG00000142156 | COL6A1  | D |   |   |   |   |
| ENSG00000010932 | FMO1    | D | D |   |   |   |
| ENSG00000204262 | COL5A2  | D |   |   |   |   |
| ENSG00000170801 | HTRA3   | D |   |   |   |   |
| ENSG00000152377 | SPOCK1  | D |   |   |   |   |
| ENSG00000262655 | SPON1   | D |   |   |   |   |
| ENSG00000138615 | CILP    | D |   |   |   |   |
| ENSG00000081237 | PTPRC   | U |   |   |   |   |
| ENSG00000106809 | OGN     | D | D |   |   |   |
| ENSG00000143369 | ECM1    | D |   |   |   |   |
| ENSG00000164647 | STEAP1  | D |   |   |   |   |
| ENSG00000115414 | FN1     | D |   |   | U |   |
| ENSG00000123610 | TNFAIP6 | D |   |   |   |   |
| ENSG00000164692 | COL1A2  | D |   |   | U |   |
| ENSG00000168542 | COL3A1  | D |   |   | U |   |
| ENSG00000166147 | FBN1    | D |   |   |   |   |
| ENSG00000108700 | CCL8    | D |   |   |   |   |
| ENSG00000038427 | VCAN    | D |   |   |   |   |
| ENSG00000124813 | RUNX2   | D |   |   |   |   |
| ENSG00000134443 | GRP     | D |   |   |   | D |
| ENSG00000106333 | PCOLCE  | D |   |   |   |   |
| ENSG00000119699 | TGFB3   | D |   |   |   |   |
| ENSG00000130635 | COL5A1  | D |   |   |   |   |
| ENSG00000093009 | CDC45   | D |   |   |   |   |
| ENSG00000186847 | KRT14   | D |   |   |   |   |
| ENSG00000164932 | CTHRC1  | D |   |   |   |   |
| ENSG00000131378 | RFTN1   | D |   |   |   |   |
| ENSG00000011028 | MRC2    | D |   |   |   |   |
| ENSG00000249992 | TMEM158 | D |   |   |   |   |
| ENSG00000102879 | CORO1A  | D |   |   |   |   |
| ENSG00000203747 | FCGR3A  | D |   |   |   |   |
| ENSG00000150907 | FOXO1   | D |   |   |   |   |
| ENSG00000117322 | CR2     | B |   |   |   |   |
| ENSG00000117091 | CD48    | B |   |   |   |   |
| ENSG00000004799 | PDK4    | D |   |   |   |   |
| ENSG00000103222 | ABCC1   | D |   |   |   |   |
| ENSG00000122862 | SRGN    | D |   |   |   |   |
| ENSG00000276886 | GREM1   | D |   |   |   |   |
| ENSG00000139053 | PDE6H   | U |   |   |   |   |
| ENSG00000156738 | MS4A1   | U |   |   |   |   |
| ENSG00000112936 | C7      | U |   |   |   |   |
| ENSG00000227507 | LTB     | U |   |   |   |   |
| ENSG00000188404 | SELL    | U |   |   |   |   |
| ENSG00000090104 | RGS1    | U |   |   |   |   |
| ENSG00000132185 | FCRLA   | U |   |   |   | D |
| ENSG00000023445 | BIRC3   | U |   |   |   |   |
| ENSG00000118503 | TNFAIP3 | U |   |   |   |   |
| ENSG00000158050 | DUSP2   | U |   |   |   |   |
| ENSG00000244734 | HBB     | U |   |   |   |   |
| ENSG00000100721 | TCL1A   | U |   |   |   |   |
| ENSG00000127528 | KLF2    | U |   |   |   |   |
| ENSG00000169508 | GPR183  | U |   |   |   |   |
| ENSG00000171346 | KRT15   | U |   |   |   | U |
| ENSG00000172724 | CCL19   | U |   |   |   |   |
| ENSG00000277586 | NEFL    | U |   |   |   |   |
| ENSG00000162896 | PIGR    | U | D |   |   |   |
| ENSG00000141293 | SKAP1   | U |   |   |   |   |
| ENSG00000125952 | MAX     | U |   |   |   |   |
| ENSG00000128609 | NDUFA5  | U |   |   |   |   |
| ENSG00000119688 | ABCD4   | U |   |   |   |   |
| ENSG00000142627 | EPHA2   | U |   |   |   |   |
| ENSG00000175567 | UCP2    | U |   |   |   |   |
| ENSG00000120129 | DUSP1   | U |   | U |   |   |
| ENSG00000108947 | EFNB3   | U |   |   |   |   |
| ENSG00000185201 | IFITM2  | D |   |   |   |   |
| ENSG00000142089 | IFITM3  | D |   |   |   |   |
| ENSG00000155760 | FZD7    | D |   |   |   |   |
| ENSG00000035862 | TIMP2   | D |   |   |   |   |
| ENSG00000172757 | CFL1    | D |   |   |   |   |
| ENSG00000052802 | MSMO1   | D |   |   |   |   |
| ENSG00000142875 | PRKACB  | D |   |   |   |   |
| ENSG00000150093 | ITGB1   | D |   |   |   |   |
| ENSG00000117118 | SDHB    | D |   |   |   |   |
| ENSG00000137745 | MMP13   | D |   |   |   |   |
| ENSG00000196177 | ACADSB  | D |   |   |   |   |
| ENSG00000149968 | MMP3    | D |   |   |   | U |
| ENSG00000185745 | IFIT1   | D |   |   |   |   |
| ENSG00000182985 | CADM1   | D |   |   |   |   |
| ENSG00000101955 | SRPX    | D | D |   |   |   |
| ENSG00000152583 | SPARCL1 | D | D |   |   |   |
| ENSG00000141526 | SLC16A3 | D |   |   |   |   |
| ENSG00000111319 | SCNN1A  | D |   |   |   | U |
| ENSG00000168461 | RAB31   | D |   |   |   |   |
| ENSG00000074590 | NUAK1   | D |   |   |   |   |
| ENSG00000170525 | PFKFB3  | D |   |   |   |   |
| ENSG00000168209 | DDIT4   | D |   |   |   |   |

|                 |           |   |   |   |  |   |
|-----------------|-----------|---|---|---|--|---|
| ENSG00000172638 | EFEMP2    | D |   |   |  |   |
| ENSG00000099860 | GADD45B   | D |   |   |  |   |
| ENSG00000169241 | SLC50A1   | D |   |   |  |   |
| ENSG00000067064 | IDI1      | D |   |   |  |   |
| ENSG00000125810 | CD93      | D |   |   |  |   |
| ENSG00000085063 | CD59      | D |   |   |  |   |
| ENSG00000169504 | CLIC4     | D |   |   |  |   |
| ENSG00000137814 | HAUS2     | D |   |   |  |   |
| ENSG00000072682 | P4HA2     | D |   |   |  |   |
| ENSG00000109046 | WSB1      | D |   |   |  |   |
| ENSG00000049860 | HEXB      | D |   |   |  |   |
| ENSG00000087076 | HSD17B14  | D |   |   |  |   |
| ENSG00000156234 | CXCL13    | U |   |   |  |   |
| ENSG00000170476 | MZB1      | U |   |   |  |   |
| ENSG00000163032 | VSNL1     | B |   |   |  |   |
| ENSG00000107317 | PTGDS     | U |   |   |  |   |
| ENSG00000007516 | BAIAP3    | U |   |   |  |   |
| ENSG00000171992 | SYNPO     | U |   |   |  |   |
| ENSG00000175003 | SLC22A1   | U |   |   |  |   |
| ENSG00000169442 | CD52      | U |   |   |  |   |
| ENSG00000186575 | NF2       | U |   |   |  |   |
| ENSG00000126457 | PRMT1     | U |   |   |  |   |
| ENSG00000137203 | TFAP2A    | U |   | U |  |   |
| ENSG00000160321 | ZNF208    | U |   |   |  |   |
| ENSG00000147168 | IL2RG     | U |   |   |  |   |
| ENSG00000133124 | IRS4      | U |   |   |  |   |
| ENSG00000143786 | CNIH3     | D |   |   |  |   |
| ENSG00000134363 | FST       | D |   |   |  |   |
| ENSG00000139330 | KERA      | D |   |   |  |   |
| ENSG00000172061 | LRRC15    | D |   |   |  |   |
| ENSG00000156103 | MMP16     | D | D |   |  |   |
| ENSG00000101825 | MXRA5     | D |   |   |  |   |
| ENSG00000197614 | MFAF5     | D |   |   |  |   |
| ENSG00000157168 | NRG1      | D |   |   |  |   |
| ENSG00000138207 | RBP4      | D |   |   |  |   |
| ENSG00000166922 | SCG5      | D |   |   |  |   |
| ENSG00000159674 | SPON2     | D |   |   |  |   |
| ENSG00000006128 | TAC1      | D |   |   |  |   |
| ENSG00000120332 | TNN       | D |   |   |  |   |
| ENSG00000184937 | WT1       | D |   |   |  |   |
| ENSG00000105989 | WNT2      | D |   |   |  |   |
| ENSG00000111339 | ART4      | U |   |   |  |   |
| ENSG00000150636 | CCDC102B  | U |   |   |  |   |
| ENSG00000137077 | CCL21     | U |   |   |  |   |
| ENSG00000007312 | CD79B     | U |   |   |  |   |
| ENSG00000081052 | COL4A4    | U |   |   |  |   |
| ENSG00000163687 | DNASE1L3  | U |   |   |  |   |
| ENSG00000103241 | FOXF1     | U |   |   |  |   |
| ENSG00000176165 | FOXF1     | U |   |   |  |   |
| ENSG00000083454 | P2RX5     | U |   |   |  |   |
| ENSG00000153064 | BANK1     | U |   |   |  |   |
| ENSG00000147606 | SLC26A7   | U |   |   |  |   |
| ENSG00000196092 | PAX5      | U |   |   |  | D |
| ENSG00000181617 | FDCSP     | U |   |   |  | D |
| ENSG00000163534 | FCRL1     | U |   |   |  |   |
| ENSG00000009790 | TRAF3IP3  | U |   |   |  |   |
| ENSG00000110777 | POU2AF1   | U |   |   |  |   |
| ENSG00000119866 | BCL11A    | U |   |   |  | D |
| ENSG00000125245 | GPR18     | U |   |   |  |   |
| ENSG00000035720 | STAP1     | U |   |   |  |   |
| ENSG00000163519 | TRAT1     | U |   |   |  |   |
| ENSG00000173698 | ADGRG2    | U |   |   |  |   |
| ENSG00000118308 | LRMP      | U |   |   |  |   |
| ENSG00000271856 | LINC01215 | U |   |   |  |   |
| ENSG00000169031 | COL4A3    | U |   |   |  |   |
| ENSG00000127152 | BCL11B    | U |   |   |  |   |
| ENSG00000211899 | IGHM      | U |   |   |  |   |
| ENSG00000162894 | FCMR      | U |   |   |  |   |
| ENSG00000174946 | GPR171    | U |   |   |  |   |
| ENSG00000241106 | HLA-DOB   | U |   |   |  |   |
| ENSG00000185811 | IKZF1     | U |   |   |  |   |
| ENSG00000091490 | SEL1L3    | U |   |   |  |   |
| ENSG00000168685 | IL7R      | U |   |   |  |   |
| ENSG00000115165 | CYTIP     | U |   |   |  |   |
| ENSG00000106511 | MEOX2     | U |   |   |  |   |
| ENSG00000164691 | TAGAP     | U |   |   |  |   |
| ENSG00000145287 | PLAC8     | U |   |   |  |   |
| ENSG00000160856 | FCRL3     | U |   |   |  |   |
| ENSG00000124406 | ATP8A1    | U |   |   |  |   |
| ENSG00000078081 | LAMP3     | U |   |   |  |   |
| ENSG00000121966 | CXCR4     | U |   | U |  |   |
| ENSG00000170542 | SERPINB9  | U |   |   |  |   |
| ENSG00000182866 | LCK       | U |   |   |  |   |
| ENSG00000180448 | ARHGAP45  | U |   |   |  |   |
| ENSG00000126353 | CCR7      | U |   |   |  |   |
| ENSG00000100985 | MMP9      | U |   |   |  |   |
| ENSG00000100368 | CSF2RB    | U |   |   |  |   |
| ENSG00000055163 | CYFIP2    | U |   |   |  |   |
| ENSG00000213658 | LAT       | U |   |   |  | D |
| ENSG00000134602 | STK26     | U |   |   |  |   |
| ENSG00000162692 | VCAM1     | U |   |   |  |   |

|                 |            |   |  |   |   |   |
|-----------------|------------|---|--|---|---|---|
| ENSG00000145779 | TNFAIP8    | U |  |   |   |   |
| ENSG00000128340 | RAC2       | U |  |   |   |   |
| ENSG00000172575 | RASGRP1    | U |  |   |   |   |
| ENSG00000166501 | PRKCB      | U |  |   |   | D |
| ENSG00000167286 | CD3D       | U |  |   |   |   |
| ENSG00000054219 | LY75       | U |  |   |   |   |
| ENSG00000172005 | MAL        | U |  |   |   |   |
| ENSG00000081320 | STK17B     | U |  |   |   |   |
| ENSG00000185862 | EVI2B      | U |  |   |   |   |
| ENSG00000196950 | SLC39A10   | U |  |   |   |   |
| ENSG00000152270 | PDE3B      | U |  |   |   |   |
| ENSG00000158987 | RAPGEF6    | U |  |   |   |   |
| ENSG00000197943 | PLCG2      | U |  |   |   |   |
| ENSG00000187239 | FNBP1      | U |  |   |   |   |
| ENSG00000204267 | TAP2       | U |  |   |   |   |
| ENSG00000073849 | ST6GAL1    | U |  |   |   |   |
| ENSG00000140968 | IRF8       | U |  |   |   |   |
| ENSG00000134954 | ETS1       | U |  |   |   |   |
| ENSG00000047365 | ARAP2      | U |  |   |   |   |
| ENSG00000169499 | PLEKHA2    | U |  |   |   |   |
| ENSG00000077943 | ITGA8      | U |  |   |   |   |
| ENSG00000100077 | GRK3       | U |  |   |   |   |
| ENSG00000182568 | SATB1      | U |  |   |   |   |
| ENSG00000115419 | GLS        | U |  |   |   |   |
| ENSG00000143119 | CD53       | U |  |   |   |   |
| ENSG00000095585 | BLNK       | U |  |   |   |   |
| ENSG00000071564 | TCF3       | U |  |   |   |   |
| ENSG00000275066 | SYNRG      | U |  |   |   |   |
| ENSG00000174718 | KIAA1551   | U |  |   |   |   |
| ENSG00000112149 | CD83       | U |  |   |   |   |
| ENSG00000084070 | SMAP2      | U |  |   |   |   |
| ENSG00000163545 | NUAK2      | U |  |   |   |   |
| ENSG00000137478 | FCHSD2     | U |  |   |   |   |
| ENSG00000104880 | ARHGEF18   | U |  |   |   |   |
| ENSG00000146094 | DOK3       | U |  |   |   | D |
| ENSG00000112365 | ZBTB24     | U |  |   |   |   |
| ENSG00000103653 | CSK        | U |  |   |   |   |
| ENSG00000110031 | LPXN       | U |  |   |   |   |
| ENSG00000241978 | AKAP2      | U |  |   |   |   |
| ENSG00000073282 | TP63       | D |  |   |   |   |
| ENSG00000135046 | ANXA1      | D |  |   |   |   |
| ENSG00000137273 | FOXF2      | D |  |   |   |   |
| ENSG00000140937 | CDH11      | D |  |   |   |   |
| ENSG00000131981 | LGALS3     | D |  |   |   |   |
| ENSG00000103196 | CRISPLD2   | D |  |   |   |   |
| ENSG00000156804 | FBXO32     | D |  |   |   |   |
| ENSG00000149591 | TAGLN      | D |  |   |   |   |
| ENSG00000141568 | FO XK2     | D |  |   |   |   |
| ENSG00000120594 | PLXDC2     | D |  |   |   |   |
| ENSG00000107796 | ACTA2      | D |  |   |   |   |
| ENSG00000102125 | TAZ        | D |  |   |   |   |
| ENSG00000164949 | GEM        | D |  |   |   |   |
| ENSG00000086991 | NOX4       | D |  |   |   |   |
| ENSG00000166741 | NNMT       | D |  |   |   |   |
| ENSG00000116774 | OLFML3     | D |  |   |   |   |
| ENSG00000244731 | C4A        | D |  |   |   |   |
| ENSG00000046653 | GPM6B      | D |  |   |   |   |
| ENSG00000122691 | TWIST1     | D |  |   |   |   |
| ENSG00000189184 | PCDH18     | D |  |   |   |   |
| ENSG00000013297 | CLDN11     | D |  |   |   |   |
| ENSG00000148848 | ADAM12     | D |  |   |   |   |
| ENSG00000118785 | SPP1       | D |  |   |   |   |
| ENSG00000174099 | MSRB3      | D |  |   |   |   |
| ENSG00000108821 | COL1A1     | D |  |   |   | U |
| ENSG00000186340 | THBS2      | D |  |   |   |   |
| ENSG00000157404 | KIT        | D |  |   |   |   |
| ENSG00000163106 | HPGDS      | D |  |   | D |   |
| ENSG00000091986 | CCDC80     | D |  |   |   |   |
| ENSG00000118523 | CTGF       | D |  | U |   |   |
| ENSG00000196139 | AKR1C3     | D |  |   |   |   |
| ENSG00000176971 | FIBIN      | D |  |   |   |   |
| ENSG00000162444 | RBP7       | D |  |   |   |   |
| ENSG00000006468 | ETV1       | D |  |   |   |   |
| ENSG00000111341 | MGP        | D |  |   |   |   |
| ENSG00000128606 | LRRC17     | D |  | D |   |   |
| ENSG00000164176 | EDIL3      | D |  |   |   |   |
| ENSG00000170561 | IRX2       | D |  |   |   |   |
| ENSG00000121005 | CRISPLD1   | D |  |   |   |   |
| ENSG00000101230 | ISM1       | D |  |   |   |   |
| ENSG00000120820 | GLT8D2     | D |  |   |   |   |
| ENSG00000085511 | MAP3K4     | D |  |   |   |   |
| ENSG00000159763 | PIP        | D |  |   | U | U |
| ENSG00000184254 | ALDH1A3    | D |  |   |   |   |
| ENSG00000145934 | TENM2      | D |  |   |   |   |
| ENSG00000143341 | HMCN1      | D |  | D |   |   |
| ENSG00000078098 | FAP        | D |  |   |   |   |
| ENSG00000012223 | LTF        | D |  |   |   |   |
| ENSG00000206075 | SERPIN5    | D |  |   |   |   |
| ENSG00000199575 | SNORD114-1 |   |  | D |   |   |
| ENSG00000170323 | FABP4      |   |  | D |   |   |
| ENSG00000174697 | LEP        |   |  | D |   |   |

|                 |             |  |   |  |  |   |
|-----------------|-------------|--|---|--|--|---|
| ENSG00000173467 | AGR3        |  | D |  |  |   |
| ENSG00000120738 | EGR1        |  | D |  |  |   |
| ENSG00000240666 | MME-AS1     |  | D |  |  |   |
| ENSG00000113594 | LIFR        |  | D |  |  |   |
| ENSG00000135218 | CD36        |  | D |  |  |   |
| ENSG00000214548 | MEG3        |  | D |  |  |   |
| ENSG00000283874 | MIR3911     |  | D |  |  |   |
| ENSG00000196616 | ADH1B       |  | D |  |  |   |
| ENSG00000200480 | SNORD114-28 |  | D |  |  |   |
| ENSG00000182463 | TSHZ2       |  | D |  |  |   |
| ENSG00000197953 | AADACL2     |  | D |  |  |   |
| ENSG00000144642 | RBMS3       |  | D |  |  |   |
| ENSG00000137558 | PI15        |  | D |  |  |   |
| ENSG00000154721 | JAM2        |  | D |  |  |   |
| ENSG00000139865 | TTC6        |  | D |  |  |   |
| ENSG00000174059 | CD34        |  | D |  |  |   |
| ENSG00000152580 | IGSF10      |  | D |  |  |   |
| ENSG00000165124 | SVEP1       |  | D |  |  |   |
| ENSG00000197776 | KLHDC1      |  | D |  |  |   |
| ENSG00000267532 | MIR497HG    |  | D |  |  |   |
| ENSG00000189056 | RELN        |  | D |  |  |   |
| ENSG00000114698 | PLSCR4      |  | D |  |  |   |
| ENSG00000163491 | NEK10       |  | D |  |  |   |
| ENSG00000078596 | ITM2A       |  | D |  |  |   |
| ENSG00000139211 | AMIGO2      |  | D |  |  |   |
| ENSG00000139910 | NOVA1       |  | D |  |  |   |
| ENSG00000266514 | MIR3689F    |  | D |  |  |   |
| ENSG00000147257 | GPC3        |  | D |  |  |   |
| ENSG00000016402 | IL20RA      |  | D |  |  |   |
| ENSG00000123243 | ITIH5       |  | D |  |  |   |
| ENSG00000136158 | SPRY2       |  | D |  |  |   |
| ENSG00000196208 | GREB1       |  | D |  |  | U |
| ENSG00000164035 | EMCN        |  | D |  |  |   |
| ENSG00000185924 | RTN4RL1     |  | D |  |  |   |
| ENSG00000103495 | MAZ         |  | U |  |  |   |
| ENSG00000175643 | RMI2        |  | U |  |  |   |
| ENSG00000135750 | KCNK1       |  | U |  |  |   |
| ENSG00000102384 | CENPI       |  | U |  |  |   |
| ENSG00000166797 | FAM96A      |  | U |  |  |   |
| ENSG00000135829 | DHX9        |  | U |  |  |   |
| ENSG00000164109 | MAD2L1      |  | U |  |  |   |
| ENSG00000102524 | TNFSF13B    |  | U |  |  |   |
| ENSG00000184661 | CDCA2       |  | U |  |  |   |
| ENSG00000169679 | BUB1        |  | U |  |  |   |
| ENSG00000138346 | DNA2        |  | U |  |  |   |
| ENSG00000170540 | ARL6IP1     |  | U |  |  |   |
| ENSG00000138071 | ACTR2       |  | U |  |  |   |
| ENSG00000175063 | UBE2C       |  | U |  |  |   |
| ENSG00000136522 | MRPL47      |  | U |  |  |   |
| ENSG00000173726 | TOMM20      |  | U |  |  |   |
| ENSG00000102172 | SMS         |  | U |  |  |   |
| ENSG00000115415 | STAT1       |  | U |  |  |   |
| ENSG00000137804 | NUSAP1      |  | U |  |  |   |
| ENSG00000121644 | DES12       |  | U |  |  |   |
| ENSG00000182481 | KPNA2       |  | U |  |  |   |
| ENSG00000138160 | KIF11       |  | U |  |  |   |
| ENSG00000146386 | ABRA1       |  | U |  |  |   |
| ENSG00000203668 | CHML        |  | U |  |  |   |
| ENSG00000163468 | CCT3        |  | U |  |  |   |
| ENSG00000080986 | NDC80       |  | U |  |  |   |
| ENSG00000011426 | ANLN        |  | U |  |  |   |
| ENSG00000277075 | HIST1H2AE   |  | U |  |  |   |
| ENSG00000117724 | CENPF       |  | U |  |  |   |
| ENSG00000133136 | GNG5P2      |  | U |  |  |   |
| ENSG00000088325 | TPX2        |  | U |  |  |   |
| ENSG00000184270 | HIST2H2AB   |  | U |  |  |   |
| ENSG00000277775 | HIST1H3F    |  | U |  |  |   |
| ENSG00000034510 | TMSB10      |  | U |  |  |   |
| ENSG00000123975 | CKS2        |  | U |  |  |   |
| ENSG00000131747 | TOP2A       |  | U |  |  |   |
| ENSG00000148513 | ANKRD30A    |  | D |  |  | U |
| ENSG00000211890 | IGHA2       |  | D |  |  |   |
| ENSG00000184258 | CDR1        |  | D |  |  |   |
| ENSG00000212384 | SNORD113-2  |  | D |  |  |   |
| ENSG00000201839 | SNORD114-3  |  | D |  |  |   |
| ENSG00000200823 | SNORD114-2  |  | D |  |  |   |
| ENSG00000187955 | COL14A1     |  | D |  |  |   |
| ENSG00000154262 | ABCA6       |  | D |  |  |   |
| ENSG00000004776 | HSPB6       |  | D |  |  |   |
| ENSG00000154175 | ABI3BP      |  | D |  |  |   |
| ENSG00000017427 | IGF1        |  | D |  |  |   |
| ENSG00000270641 | TSIX        |  | D |  |  |   |
| ENSG00000107562 | CXCL12      |  | D |  |  |   |
| ENSG00000154263 | ABCA10      |  | D |  |  |   |
| ENSG00000201700 | SNORD113-3  |  | D |  |  |   |
| ENSG00000272344 | SNORD114-21 |  | D |  |  |   |
| ENSG00000141338 | ABCA8       |  | D |  |  |   |
| ENSG00000070193 | FGF10       |  | D |  |  |   |
| ENSG00000109472 | CPE         |  | D |  |  |   |
| ENSG00000199390 | SNORD114-7  |  | D |  |  |   |
| ENSG00000201557 | SNORD114-15 |  | D |  |  |   |

|                 |             |  |   |   |  |   |   |
|-----------------|-------------|--|---|---|--|---|---|
| ENSG00000127920 | GNG11       |  | D |   |  |   |   |
| ENSG00000196569 | LAMA2       |  | D |   |  |   |   |
| ENSG00000114771 | AADAC       |  | D |   |  |   |   |
| ENSG00000173432 | SAA1        |  | D |   |  |   |   |
| ENSG00000200612 | SNORD114-25 |  | D |   |  |   |   |
| ENSG00000264424 | MYH4        |  | D |   |  |   |   |
| ENSG00000106483 | SFRP4       |  | D |   |  |   |   |
| ENSG00000164124 | TMEM144     |  | D |   |  |   |   |
| ENSG00000133083 | DCLK1       |  | D |   |  |   |   |
| ENSG00000109686 | SH3D19      |  | D |   |  |   |   |
| ENSG00000126785 | RHOJ        |  | D |   |  |   |   |
| ENSG00000205364 | MT1M        |  | D |   |  |   |   |
| ENSG00000130176 | CNN1        |  | D |   |  |   |   |
| ENSG00000164946 | FREM1       |  | D |   |  |   |   |
| ENSG00000206384 | COL6A6      |  | D |   |  |   |   |
| ENSG00000134138 | MEIS2       |  | D |   |  |   |   |
| ENSG00000121297 | TSHZ3       |  | D |   |  |   |   |
| ENSG00000178081 | ULK4P3      |  | D |   |  |   |   |
| ENSG00000136160 | EDNRB       |  | D |   |  |   |   |
| ENSG00000144218 | AFF3        |  | D |   |  |   |   |
| ENSG00000053328 | METTL24     |  | D |   |  |   |   |
| ENSG00000169744 | LDB2        |  | D |   |  |   |   |
| ENSG00000092009 | CMA1        |  | D |   |  |   |   |
| ENSG00000203697 | CAPN8       |  | D |   |  |   |   |
| ENSG00000164741 | DLC1        |  | D |   |  |   |   |
| ENSG00000088992 | TESC        |  | D |   |  |   |   |
| ENSG00000091656 | ZFX4        |  | D |   |  |   |   |
| ENSG00000197635 | DPP4        |  | D |   |  |   |   |
| ENSG00000156136 | DCK         |  | U |   |  |   |   |
| ENSG00000139826 | ABHD13      |  | U |   |  |   |   |
| ENSG00000181163 | NPM1        |  | U |   |  |   |   |
| ENSG00000147669 | POLR2K      |  | U |   |  |   |   |
| ENSG00000160813 | PPP1R35     |  | U |   |  |   |   |
| ENSG00000076382 | SPAG5       |  | U |   |  |   |   |
| ENSG00000163808 | KIF15       |  | U |   |  |   |   |
| ENSG00000204604 | ZNF468      |  | U |   |  |   |   |
| ENSG00000111412 | C12orf49    |  | U |   |  |   |   |
| ENSG00000024526 | DEPDC1      |  | U |   |  |   |   |
| ENSG00000132463 | GRSF1       |  | U |   |  |   |   |
| ENSG00000239105 | RNU7-73P    |  | U |   |  |   |   |
| ENSG00000126787 | DLGAP5      |  | U |   |  |   |   |
| ENSG00000154839 | SKA1        |  | U |   |  |   |   |
| ENSG00000170312 | CDK1        |  | U |   |  |   |   |
| ENSG00000249784 | SCARNA22    |  | U |   |  |   | D |
| ENSG00000116748 | AMPD1       |  |   | D |  |   |   |
| ENSG00000104938 | CLEC4M      |  |   | D |  |   |   |
| ENSG00000081041 | CXCL2       |  |   | D |  |   |   |
| ENSG00000163735 | CXCL5       |  |   | D |  |   |   |
| ENSG00000184500 | PROS1       |  |   | D |  |   |   |
| ENSG00000136011 | STAB2       |  |   | D |  |   |   |
| ENSG00000003436 | TFPI        |  |   | D |  |   |   |
| ENSG00000106541 | AGR2        |  |   | U |  |   |   |
| ENSG00000129354 | AP1M2       |  |   | U |  |   |   |
| ENSG00000160862 | AZGP1       |  |   | U |  |   |   |
| ENSG00000143320 | CRABP2      |  |   | U |  |   |   |
| ENSG00000129514 | FOXA1       |  |   | U |  |   | U |
| ENSG00000089356 | FXYD3       |  |   | U |  |   | U |
| ENSG00000185499 | MUC1        |  |   | U |  |   | U |
| ENSG00000189334 | S100A14     |  |   | U |  |   |   |
| ENSG00000087510 | TFAP2C      |  |   | U |  |   |   |
| ENSG00000188157 | AGRN        |  |   |   |  | U |   |
| ENSG00000164171 | ITGA2       |  |   |   |  | U |   |
| ENSG00000144668 | ITGA9       |  |   |   |  | D |   |
| ENSG00000139626 | ITGB7       |  |   |   |  | D |   |
| ENSG00000005961 | ITGA2B      |  |   |   |  | D |   |
| ENSG00000026508 | CD44        |  |   |   |  | D |   |
| ENSG00000185245 | GP1BA       |  |   |   |  | D |   |
| ENSG00000115232 | ITGA4       |  |   |   |  | D |   |
| ENSG00000263597 | MIR3936     |  |   |   |  |   | U |
| ENSG00000284567 | MIR223      |  |   |   |  |   | U |
| ENSG00000200983 | SNORA3A     |  |   |   |  |   | U |
| ENSG00000207145 | SNORA18     |  |   |   |  |   | U |
| ENSG00000283513 | MIR941-3    |  |   |   |  |   | U |
| ENSG00000207088 | SNORA7B     |  |   |   |  |   | U |
| ENSG00000238363 | SNORA13     |  |   |   |  |   | U |
| ENSG00000206612 | SNORA2A     |  |   |   |  |   | U |
| ENSG00000251898 | SCARNA11    |  |   |   |  |   | U |
| ENSG00000265810 | MIR3907     |  |   |   |  |   | U |
| ENSG00000239183 | SNORA84     |  |   |   |  |   | U |
| ENSG00000197838 | CYP2A13     |  |   |   |  |   | U |
| ENSG00000202363 | SNORA62     |  |   |   |  |   | U |
| ENSG00000233101 | HOXB-AS3    |  |   |   |  |   | U |
| ENSG00000163041 | H3F3A       |  |   |   |  |   | U |
| ENSG00000214407 | LINC02085   |  |   |   |  |   | U |
| ENSG00000162989 | KCNJ3       |  |   |   |  |   | U |
| ENSG00000205361 | MT1DP       |  |   |   |  |   | U |
| ENSG00000179676 | LINC00305   |  |   |   |  |   | U |
| ENSG00000126890 | CTAG2       |  |   |   |  |   | U |
| ENSG00000171446 | KRT27       |  |   |   |  |   | U |
| ENSG00000212899 | KRTAP3-3    |  |   |   |  |   | U |
| ENSG00000186910 | SERPINA11   |  |   |   |  |   | U |

|                 |                 |  |  |  |  |   |
|-----------------|-----------------|--|--|--|--|---|
| ENSG00000183644 | C11orf88        |  |  |  |  | U |
| ENSG00000204511 | MCCD1           |  |  |  |  | U |
| ENSG00000274618 | HIST1H4F        |  |  |  |  | U |
| ENSG00000136698 | CFC1            |  |  |  |  | U |
| ENSG00000249020 | SNORA58         |  |  |  |  | U |
| ENSG00000243543 | WFDC6           |  |  |  |  | U |
| ENSG00000124490 | CRISP2          |  |  |  |  | U |
| ENSG00000158301 | GPRASP2         |  |  |  |  | U |
| ENSG00000181359 | HSP90AA6P       |  |  |  |  | U |
| ENSG00000196800 | SPINK14         |  |  |  |  | U |
| ENSG00000276430 | FAM25C          |  |  |  |  | U |
| ENSG00000142025 | DMRTC2          |  |  |  |  | U |
| ENSG00000213931 | HBE1            |  |  |  |  | U |
| ENSG00000118245 | TNP1            |  |  |  |  | U |
| ENSG00000224689 | ZNF812P         |  |  |  |  | U |
| ENSG00000155622 | XAGE2           |  |  |  |  | U |
| ENSG00000186393 | KRT26           |  |  |  |  | U |
| ENSG00000011052 | NME1-NME2       |  |  |  |  | U |
| ENSG00000125787 | GNRH2           |  |  |  |  | U |
| ENSG00000108684 | ASIC2           |  |  |  |  | U |
| ENSG00000147689 | FAM83A          |  |  |  |  | U |
| ENSG00000152093 | CFC1B           |  |  |  |  | U |
| ENSG00000212283 | SNORD89         |  |  |  |  | D |
| ENSG00000207635 | MIR499A         |  |  |  |  | D |
| ENSG00000271798 | SNORA51         |  |  |  |  | D |
| ENSG00000210825 | SNORA40         |  |  |  |  | D |
| ENSG00000207493 | SNORA46         |  |  |  |  | D |
| ENSG00000252906 | SCARNA3         |  |  |  |  | D |
| ENSG00000207051 | SNORA27         |  |  |  |  | D |
| ENSG00000206799 | SNORA32         |  |  |  |  | D |
| ENSG00000163586 | FABP1           |  |  |  |  | D |
| ENSG00000216141 | MIR941-2        |  |  |  |  | D |
| ENSG00000216195 | MIR941-4        |  |  |  |  | D |
| ENSG00000206834 | SNORA1          |  |  |  |  | D |
| ENSG00000206633 | SNORA80B        |  |  |  |  | D |
| ENSG00000200816 | SNORA38         |  |  |  |  | D |
| ENSG00000207392 | SNORA20         |  |  |  |  | D |
| ENSG00000238835 | SCARNA18        |  |  |  |  | D |
| ENSG00000239149 | SNORA59A        |  |  |  |  | D |
| ENSG00000266079 | SNORA59B        |  |  |  |  | D |
| ENSG00000281910 | SNORA50A        |  |  |  |  | D |
| ENSG00000207313 | SNORA2B         |  |  |  |  | D |
| ENSG00000221491 | SNORA2C         |  |  |  |  | D |
| ENSG00000186146 | DEFB131A        |  |  |  |  | D |
| ENSG00000264229 | RNU4ATAC        |  |  |  |  | D |
| ENSG00000188729 | OSTN            |  |  |  |  | D |
| ENSG00000206760 | SNORA6          |  |  |  |  | D |
| ENSG00000164266 | SPINK1          |  |  |  |  | D |
| ENSG00000206634 | SNORA22         |  |  |  |  | D |
| ENSG00000243955 | GSTA1           |  |  |  |  | D |
| ENSG00000280498 | SNORA16A        |  |  |  |  | D |
| ENSG00000199266 | SNORA60         |  |  |  |  | D |
| ENSG00000235408 | SNORA71B        |  |  |  |  | D |
| ENSG0000016490  | CLCA1           |  |  |  |  | D |
| ENSG00000205649 | HTN3            |  |  |  |  | D |
| ENSG00000201772 | SNORA5C         |  |  |  |  | D |
| ENSG00000163202 | LCE3D           |  |  |  |  | D |
| ENSG00000169605 | GKN1            |  |  |  |  | D |
| ENSG00000228962 | HCG23           |  |  |  |  | D |
| ENSG00000206034 | DEFB109B        |  |  |  |  | D |
| ENSG00000165828 | PRAP1           |  |  |  |  | D |
| ENSG00000169469 | SPRR1B          |  |  |  |  | D |
| ENSG00000236552 | RPL13AP5        |  |  |  |  | D |
| ENSG00000171180 | OR2M4           |  |  |  |  | D |
| ENSG00000154646 | TMPRSS15        |  |  |  |  | D |
| ENSG00000173237 | C11orf86        |  |  |  |  | D |
| ENSG00000151418 | ATP6V1G3        |  |  |  |  | D |
| ENSG00000176009 | ASCL3           |  |  |  |  | D |
| ENSG00000167117 | LINC00483       |  |  |  |  | D |
| ENSG00000197745 | SCGB1D4         |  |  |  |  | D |
| ENSG00000254870 | ATP6V1G2-DDX39B |  |  |  |  | D |
| ENSG00000164816 | DEFA5           |  |  |  |  | D |
| ENSG00000126550 | HTN1            |  |  |  |  | D |
| ENSG00000166869 | CHP2            |  |  |  |  | D |
| ENSG00000240108 | NCOR1P1         |  |  |  |  | D |
| ENSG00000171201 | SMR3B           |  |  |  |  | D |
| ENSG00000266200 | PNLIPRP2        |  |  |  |  | D |
| ENSG00000069482 | GAL             |  |  |  |  | D |
| ENSG00000137860 | SLC28A2         |  |  |  |  | D |
| ENSG00000118972 | FGF23           |  |  |  |  | D |
| ENSG00000129824 | RPS4Y1          |  |  |  |  | D |
| ENSG00000275126 | HIST1H4L        |  |  |  |  | D |
| ENSG00000231298 | LINC00704       |  |  |  |  | D |
| ENSG00000113430 | IRX4            |  |  |  |  | D |
| ENSG00000090402 | SI              |  |  |  |  | D |
| ENSG00000139515 | PDX1            |  |  |  |  | D |
| ENSG00000165863 | C10orf82        |  |  |  |  | D |
| ENSG00000057149 | SERPINB3        |  |  |  |  | D |
| ENSG00000169474 | SPRR1A          |  |  |  |  | D |
| ENSG00000255986 | MT1JP           |  |  |  |  | D |
| ENSG00000168333 | PPDPFL          |  |  |  |  | D |



|                 |           |  |  |  |  |   |
|-----------------|-----------|--|--|--|--|---|
| ENSG00000182793 | GSTA5     |  |  |  |  | D |
| ENSG00000123576 | ESX1      |  |  |  |  | D |
| ENSG00000167165 | UGT1A6    |  |  |  |  | D |
| ENSG00000136352 | NKX2-1    |  |  |  |  | D |
| ENSG00000259527 | LINC00052 |  |  |  |  | D |
| ENSG00000144820 | ADGRG7    |  |  |  |  | D |
| ENSG00000106384 | MOGAT3    |  |  |  |  | D |
| ENSG00000180066 | C10orf91  |  |  |  |  | D |
| ENSG00000171136 | RLN3      |  |  |  |  | D |
| ENSG00000277858 | H2AFB2    |  |  |  |  | D |
| ENSG00000164822 | DEFA6     |  |  |  |  | D |
| ENSG00000238205 | MPC1L     |  |  |  |  | D |
| ENSG0000082929  | LINC01587 |  |  |  |  | D |
| ENSG00000175868 | CALCB     |  |  |  |  | D |
| ENSG00000176840 | MIR7-3HG  |  |  |  |  | D |
| ENSG00000196475 | GK2       |  |  |  |  | D |
| ENSG00000179796 | LRRC3B    |  |  |  |  | D |
| ENSG00000274749 | KRTAP7-1  |  |  |  |  | D |
| ENSG00000179751 | SYCN      |  |  |  |  | D |
| ENSG00000276998 | REXO1L2P  |  |  |  |  | D |
| ENSG00000254636 | ARMS2     |  |  |  |  | D |
| ENSG00000167531 | LALBA     |  |  |  |  | D |
| ENSG00000105205 | CLC       |  |  |  |  | D |
| ENSG00000146678 | IGFBP1    |  |  |  |  | D |
| ENSG00000171557 | FGG       |  |  |  |  | D |
| ENSG00000182083 | OR6B2     |  |  |  |  | D |
| ENSG00000124469 | CEACAM8   |  |  |  |  | D |
| ENSG00000227234 | SPANXB1   |  |  |  |  | D |
| ENSG00000171431 | KRT20     |  |  |  |  | D |
| ENSG00000170477 | KRT4      |  |  |  |  | D |
| ENSG00000169575 | VPREB1    |  |  |  |  | D |
| ENSG00000114113 | RBP2      |  |  |  |  | D |
| ENSG00000136872 | ALDOB     |  |  |  |  | D |
| ENSG00000101197 | BIRC7     |  |  |  |  | D |
| ENSG00000130720 | FIBCD1    |  |  |  |  | D |
| ENSG00000173702 | MUC13     |  |  |  |  | D |
| ENSG00000162897 | FCAMR     |  |  |  |  | D |
| ENSG00000100867 | DHRS2     |  |  |  |  | D |
| ENSG00000188000 | OR7D2     |  |  |  |  | D |
| ENSG00000249948 | GBA3      |  |  |  |  | D |
| ENSG00000169903 | TM4SF4    |  |  |  |  | D |
| ENSG00000100362 | PVALB     |  |  |  |  | D |
| ENSG0000026559  | KCNG1     |  |  |  |  | D |
| ENSG00000254415 | SIGLEC14  |  |  |  |  | D |
| ENSG00000134193 | REG4      |  |  |  |  | D |
| ENSG00000104921 | FCER2     |  |  |  |  | D |
| ENSG00000170054 | SERPINA9  |  |  |  |  | D |
| ENSG00000132677 | RHBG      |  |  |  |  | D |
| ENSG00000159958 | TNFRSF13C |  |  |  |  | D |
| ENSG00000166736 | HTR3A     |  |  |  |  | D |
| ENSG00000142449 | FBN3      |  |  |  |  | D |
| ENSG00000234965 | SHISA8    |  |  |  |  | D |
| ENSG00000173404 | INSM1     |  |  |  |  | D |
| ENSG00000167483 | FAM129C   |  |  |  |  | D |
| ENSG00000169994 | MYO7B     |  |  |  |  | D |
| ENSG00000188536 | HBA2      |  |  |  |  | D |
| ENSG00000183691 | NOG       |  |  |  |  | D |
| ENSG00000170486 | KRT72     |  |  |  |  | D |
| ENSG00000137101 | CD72      |  |  |  |  | D |
| ENSG00000177455 | CD19      |  |  |  |  | D |
| ENSG00000165178 | NCF1C     |  |  |  |  | D |
| ENSG00000104903 | LYL1      |  |  |  |  | D |
| ENSG00000012124 | CD22      |  |  |  |  | D |
| ENSG00000122224 | LY9       |  |  |  |  | D |
| ENSG00000160867 | FGFR4     |  |  |  |  | D |
| ENSG00000007129 | CEACAM21  |  |  |  |  | D |
| ENSG00000235621 | LINC00494 |  |  |  |  | D |
| ENSG00000198796 | ALPK2     |  |  |  |  | D |
| ENSG00000213199 | ASIC3     |  |  |  |  | D |
| ENSG00000260335 |           |  |  |  |  | D |
| ENSG00000128218 | VPREB3    |  |  |  |  | D |
| ENSG00000138623 | SEMA7A    |  |  |  |  | D |
| ENSG00000173200 | PARP15    |  |  |  |  | D |
| ENSG00000095794 | CREM      |  |  |  |  | D |
| ENSG00000136573 | BLK       |  |  |  |  | D |
| ENSG00000204165 | CXorf65   |  |  |  |  | D |
| ENSG00000123612 | ACVR1C    |  |  |  |  | D |
| ENSG00000142512 | SIGLEC10  |  |  |  |  | D |
| ENSG00000005471 | ABCB4     |  |  |  |  | D |
| ENSG00000140379 | BCL2A1    |  |  |  |  | D |
| ENSG00000187243 | MAGED4B   |  |  |  |  | D |
| ENSG00000124334 | IL9R      |  |  |  |  | D |
| ENSG00000079263 | SP140     |  |  |  |  | D |
| ENSG00000107736 | CDH23     |  |  |  |  | D |
| ENSG00000076770 | MBNL3     |  |  |  |  | D |
| ENSG00000168237 | GLYCTK    |  |  |  |  | D |
| ENSG00000161405 | IKZF3     |  |  |  |  | D |
| ENSG00000176884 | GRIN1     |  |  |  |  | D |
| ENSG00000089012 | SIRPG     |  |  |  |  | D |
| ENSG00000166405 | RIC3      |  |  |  |  | D |
| ENSG00000103227 | LMF1      |  |  |  |  | D |

|                 |           |  |  |   |  |  |   |
|-----------------|-----------|--|--|---|--|--|---|
| ENSG00000130844 | ZNF331    |  |  |   |  |  | D |
| ENSG00000188681 | TEKT4P2   |  |  |   |  |  | D |
| ENSG00000131196 | NFATC1    |  |  |   |  |  | D |
| ENSG00000182378 | PLCXD1    |  |  |   |  |  | D |
| ENSG00000029534 | ANK1      |  |  |   |  |  | D |
| ENSG00000181722 | ZBTB20    |  |  |   |  |  | D |
| ENSG00000087085 | ACHE      |  |  |   |  |  | D |
| ENSG00000133466 | C1QTNF6   |  |  |   |  |  | D |
| ENSG00000090554 | FLT3LG    |  |  |   |  |  | D |
| ENSG00000230487 | PSMG3-AS1 |  |  |   |  |  | D |
| ENSG00000128604 | IRF5      |  |  |   |  |  | D |
| ENSG00000164620 | RELL2     |  |  |   |  |  | D |
| ENSG00000163239 | TDRD10    |  |  |   |  |  | D |
| ENSG00000239382 | ALKBH6    |  |  |   |  |  | D |
| ENSG00000113580 | NR3C1     |  |  |   |  |  | D |
| ENSG00000135299 | ANKRD6    |  |  |   |  |  | D |
| ENSG00000120913 | PDLIM2    |  |  |   |  |  | D |
| ENSG00000120539 | MASTL     |  |  |   |  |  | D |
| ENSG00000163564 | PYHIN1    |  |  |   |  |  | D |
| ENSG00000186073 | C15orf41  |  |  |   |  |  | D |
| ENSG00000065882 | TBC1D1    |  |  |   |  |  | D |
| ENSG00000133624 | ZNF767P   |  |  |   |  |  | D |
| ENSG00000148019 | CEP78     |  |  |   |  |  | D |
| ENSG00000162946 | DISC1     |  |  |   |  |  | D |
| ENSG00000176102 | CSTF3     |  |  |   |  |  | D |
| ENSG00000134256 | CD101     |  |  |   |  |  | D |
| ENSG00000119314 | PTBP3     |  |  |   |  |  | D |
| ENSG00000167757 | KLK11     |  |  |   |  |  | U |
| ENSG00000161055 | SCGB3A1   |  |  |   |  |  | U |
| ENSG00000166509 | CLEC3A    |  |  |   |  |  | U |
| ENSG00000129451 | KLK10     |  |  |   |  |  | U |
| ENSG00000186474 | KLK12     |  |  |   |  |  | U |
| ENSG00000167759 | KLK13     |  |  |   |  |  | U |
| ENSG00000198077 | CYP2A7    |  |  |   |  |  | U |
| ENSG00000171102 | OBP2B     |  |  |   |  |  | U |
| ENSG00000166006 | KCNC2     |  |  |   |  |  | U |
| ENSG00000153002 | CPB1      |  |  |   |  |  | U |
| ENSG00000089199 | CHGB      |  |  |   |  |  | U |
| ENSG00000205002 | AARD      |  |  |   |  |  | U |
| ENSG00000198650 | TAT       |  |  |   |  |  | U |
| ENSG00000196136 | SERPINA3  |  |  |   |  |  | U |
| ENSG00000169297 | NR0B1     |  |  |   |  |  | U |
| ENSG00000122584 | NXPH1     |  |  |   |  |  | U |
| ENSG00000006611 | USH1C     |  |  |   |  |  | U |
| ENSG00000078898 | BPIFB2    |  |  |   |  |  | U |
| ENSG00000138696 | BMPR1B    |  |  |   |  |  | U |
| ENSG00000120251 | GRIA2     |  |  |   |  |  | U |
| ENSG00000159212 | CLIC6     |  |  |   |  |  | U |
| ENSG00000108244 | KRT23     |  |  |   |  |  | U |
| ENSG00000119938 | PPP1R3C   |  |  |   |  |  | U |
| ENSG00000172551 | MUCL1     |  |  |   |  |  | U |
| ENSG00000178372 | CALML5    |  |  |   |  |  | U |
| ENSG00000136457 | CHAD      |  |  |   |  |  | U |
| ENSG00000039139 | DNAH5     |  |  |   |  |  | U |
| ENSG00000243064 | ABCC13    |  |  |   |  |  | U |
| ENSG00000178538 | CA8       |  |  |   |  |  | U |
| ENSG00000180777 | ANKRD30B  |  |  |   |  |  | U |
| ENSG00000162782 | TDRD5     |  |  |   |  |  | U |
| ENSG00000105825 | TFPI2     |  |  | U |  |  | U |
| ENSG00000007062 | PROM1     |  |  |   |  |  | U |
| ENSG00000013588 | GPRC5A    |  |  |   |  |  | U |
| ENSG00000115457 | IGFBP2    |  |  |   |  |  | U |
| ENSG00000164403 | SHROOM1   |  |  |   |  |  | U |
| ENSG00000112183 | RBM24     |  |  |   |  |  | U |
| ENSG00000163993 | S100P     |  |  |   |  |  | U |
| ENSG00000166920 | C15orf48  |  |  |   |  |  | U |
| ENSG00000117154 | IGSF21    |  |  |   |  |  | U |
| ENSG00000157214 | STEAP2    |  |  |   |  |  | U |
| ENSG00000124171 | PARD6B    |  |  |   |  |  | U |
| ENSG00000265766 | CXADRP3   |  |  |   |  |  | U |
| ENSG00000162078 | ZG16B     |  |  |   |  |  | U |
| ENSG00000138771 | SHROOM3   |  |  |   |  |  | U |
| ENSG00000144891 | AGTR1     |  |  |   |  |  | U |
| ENSG00000168350 | DEGS2     |  |  |   |  |  | U |
| ENSG00000070087 | PFN2      |  |  |   |  |  | U |
| ENSG00000147642 | SYBU      |  |  |   |  |  | U |
| ENSG00000169083 | AR        |  |  |   |  |  | U |
| ENSG00000078114 | NEBL      |  |  |   |  |  | U |
| ENSG00000155066 | PROM2     |  |  |   |  |  | U |
| ENSG00000123838 | C4BPA     |  |  | U |  |  |   |
| ENSG00000112308 | C6orf62   |  |  | U |  |  |   |
| ENSG00000167618 | LAIR2     |  |  | U |  |  |   |
| ENSG00000262406 | MMP12     |  |  | U |  |  |   |
| ENSG00000110195 | FOLR1     |  |  | U |  |  |   |
| ENSG00000178878 | APOLD1    |  |  | U |  |  |   |
| ENSG00000109321 | AREG      |  |  | U |  |  |   |
| ENSG00000177606 | JUN       |  |  | U |  |  |   |
| ENSG00000124193 | SRSF6     |  |  | U |  |  |   |
