# Supplementary material for: Molecular patterns of cancer colonisation in lymph nodes of breast cancer patients
Source: PubMed Central journal article supplement (PMC6247766; doi:10.1186/s13058-018-1070-3), 2018-11-20
Supplement: 13058_2018_1070_MOESM4_ESM.pdf [file 13058_2018_1070_MOESM4_ESM.pdf]

| GO term    | Description                                                        | Scenario 1 | Scenario 2 | Scenario 3 | Scenario 4 | Scenario 5 | Scenario 6 |
|------------|--------------------------------------------------------------------|------------|------------|------------|------------|------------|------------|
| G0:0001503 | ossification                                                       | D          | D          |            |            |            |            |
| G0:0007155 | cell adhesion                                                      | U          | D          |            |            | D          |            |
| G0:0009888 | tissue development                                                 | D          |            | U          |            |            |            |
| G0:0022610 | biological adhesion                                                | U          | D          |            |            | D          |            |
| G0:0030198 | extracellular matrix organization                                  | D          | D          |            |            | U          |            |
| G0:0030574 | collagen catabolic process                                         | D          |            |            |            |            |            |
| G0:0032963 | collagen metabolic process                                         | D          |            |            |            | U          |            |
| G0:0043062 | extracellular structure organization                               | D          | D          |            |            | U          |            |
| G0:0044236 | multicellular organism metabolic process                           | D          |            |            |            | U          |            |
| G0:0044243 | multicellular organismal catabolic process                         | D          |            |            |            |            |            |
| G0:0044259 | multicellular organismal macromolecule metabolic process           | D          |            |            |            | U          |            |
| G0:0042127 | regulation of cell proliferation                                   | D          | D          |            |            |            |            |
| G0:0008283 | cell proliferation                                                 | D          | D          |            |            |            |            |
| G0:0022617 | extracellular matrix disassembly                                   | D          |            |            |            |            |            |
| G0:0040011 | locomotion                                                         | D          | D          |            |            | D          |            |
| G0:0048870 | cell motility                                                      | D          | D          |            |            | D          |            |
| G0:0051674 | localization of cell                                               | D          | D          |            |            | D          |            |
| G0:0048646 | anatomical structure formation involved in morphogenesis           | D          |            | U          |            | U          |            |
| G0:0016477 | cell migration                                                     | U          | D          |            |            | D          |            |
| G0:0006928 | movement of cell or subcellular component                          | D          | D          |            |            | D          |            |
| G0:0072359 | circulatory system development                                     | D          | D          |            |            |            |            |
| G0:0001501 | skeletal system development                                        | D          |            |            |            |            |            |
| G0:0009887 | animal organ morphogenesis                                         | D          |            | U          |            |            |            |
| G0:0001944 | vasculature development                                            | D          | D          |            |            |            |            |
| G0:0031214 | biomineral tissue development                                      | D          |            |            |            |            |            |
| G0:0072358 | cardiovascular system development                                  | D          | D          |            |            |            |            |
| G0:2000026 | regulation of multicellular organismal development                 | D          | D          | U          |            |            |            |
| G0:0001568 | blood vessel development                                           | D          | D          |            |            |            |            |
| G0:0022603 | regulation of anatomical structure morphogenesis                   | D          | D          |            |            |            |            |
| G0:0009719 | response to endogenous stimulus                                    | D          |            | U          |            |            |            |
| G0:0051270 | regulation of cellular component movement                          | D          |            |            |            |            |            |
| G0:0071495 | cellular response to endogenous stimulus                           | D          |            |            |            |            |            |
| G0:0030282 | bone mineralization                                                | D          | D          |            |            |            |            |
| G0:0030155 | regulation of cell adhesion                                        | U          | D          |            |            |            |            |
| G0:0070848 | response to growth factor                                          | D          |            |            |            |            |            |
| G0:0071363 | cellular response to growth factor stimulus                        | D          |            |            |            |            |            |
| G0:2000145 | regulation of cell motility                                        | D          |            |            |            |            |            |
| G0:1901700 | response to oxygen-containing compound                             | D          |            |            |            |            |            |
| G0:0051093 | negative regulation of developmental process                       | D          |            |            |            |            |            |
| G0:0040012 | regulation of locomotion                                           | D          |            |            |            |            |            |
| G0:0016337 | single organismal cell-cell adhesion                               | U          |            |            |            | D          |            |
| G0:0045321 | leukocyte activation                                               | U          |            |            |            |            |            |
| G0:0046649 | lymphocyte activation                                              | U          |            |            |            |            |            |
| G0:0098609 | cell-cell adhesion                                                 | U          |            |            |            | D          |            |
| G0:0001775 | cell activation                                                    | U          |            |            |            |            |            |
| G0:0098602 | single organism cell adhesion                                      | U          |            |            |            | D          |            |
| G0:0006955 | immune response                                                    | U          |            |            |            |            |            |
| G0:0002520 | immune system development                                          | U          |            |            |            |            |            |
| G0:0048534 | hematopoietic or lymphoid organ development                        | U          |            |            |            |            |            |
| G0:0002682 | regulation of immune system process                                | U          |            |            |            |            |            |
| G0:0030098 | lymphocyte differentiation                                         | U          |            |            |            |            |            |
| G0:0002521 | leukocyte differentiation                                          | U          |            |            |            |            |            |
| G0:0002684 | positive regulation of immune system process                       | U          |            |            |            |            |            |
| G0:0030097 | hemopoiesis                                                        | U          |            |            |            |            |            |
| G0:0002694 | regulation of leukocyte activation                                 | U          |            |            |            |            |            |
| G0:0050857 | positive regulation of antigen receptor-mediated signaling pathway | U          |            |            |            |            |            |
| G0:0008219 | cell death                                                         | U          |            | U          |            |            |            |
| G0:0050865 | regulation of cell activation                                      | U          |            |            |            |            |            |
| G0:0012501 | programmed cell death                                              | U          |            | U          |            |            |            |
| G0:0051249 | regulation of lymphocyte activation                                | U          |            |            |            |            |            |
| G0:0006915 | apoptotic process                                                  | U          |            | U          |            |            |            |
| G0:0042113 | B cell activation                                                  | U          |            |            |            |            |            |
| G0:0007159 | leukocyte cell-cell adhesion                                       | U          |            |            |            |            |            |
| G0:0042110 | T cell activation                                                  | U          |            |            |            |            |            |
| G0:0070489 | T cell aggregation                                                 | U          |            |            |            |            |            |
| G0:0071593 | lymphocyte aggregation                                             | U          |            |            |            |            |            |
| G0:0070486 | leukocyte aggregation                                              | U          |            |            |            |            |            |
| G0:0050851 | antigen receptor-mediated signaling pathway                        | U          |            |            |            |            |            |
| G0:0043069 | negative regulation of programmed cell death                       | U          |            |            |            |            |            |
| G0:0043067 | regulation of programmed cell death                                | U          |            |            |            |            |            |
| G0:0022407 | regulation of cell-cell adhesion                                   | U          |            |            |            |            |            |
| G0:0050854 | regulation of antigen receptor-mediated signaling pathway          | U          |            |            |            |            |            |
| G0:0060548 | negative regulation of cell death                                  | U          |            | U          |            |            |            |
| G0:0002696 | positive regulation of leukocyte activation                        | U          |            |            |            |            |            |
| G0:0010941 | regulation of cell death                                           | U          |            |            |            |            |            |
| G0:0042981 | regulation of apoptotic process                                    | U          |            |            |            |            |            |
| G0:0060348 | bone development                                                   |            | D          |            |            |            |            |
| G0:0008285 | negative regulation of cell proliferation                          |            | D          |            |            |            |            |
| G0:0050673 | epithelial cell proliferation                                      |            | D          |            |            |            |            |
| G0:0043549 | regulation of kinase activity                                      |            | D          |            |            |            |            |
| G0:0045785 | positive regulation of cell adhesion                               |            | D          |            |            |            |            |
| G0:0050678 | regulation of epithelial cell proliferation                        |            | D          |            |            |            |            |

|            |                                                                  |  |   |   |   |   |   |
|------------|------------------------------------------------------------------|--|---|---|---|---|---|
| G0:0045859 | regulation of protein kinase activity                            |  | D |   |   |   |   |
| G0:2000050 | regulation of non-canonical Wnt signaling pathway                |  | D |   |   |   |   |
| G0:0051057 | positive regulation of small GTPase mediated signal transduction |  | D |   |   |   |   |
| G0:1901342 | regulation of vasculature development                            |  | D |   |   |   |   |
| G0:0006027 | glycosaminoglycan catabolic process                              |  | D |   |   |   |   |
| G0:0051050 | positive regulation of transport                                 |  | D |   |   |   |   |
| G0:0042160 | lipoprotein modification                                         |  | D |   |   |   |   |
| G0:0042161 | lipoprotein oxidation                                            |  | D |   |   |   |   |
| G0:0060437 | lung growth                                                      |  | D |   |   |   |   |
| G0:0072223 | metanephric glomerular mesangium development                     |  | D |   |   |   |   |
| G0:0051094 | positive regulation of developmental process                     |  | D |   |   |   |   |
| G0:0014068 | positive regulation of phosphatidylinositol 3-kinase signaling   |  | D |   |   |   |   |
| G0:0000280 | nuclear division                                                 |  | U |   |   |   |   |
| G0:0007059 | chromosome segregation                                           |  | U |   |   |   |   |
| G0:0048285 | organelle fission                                                |  | U |   |   |   |   |
| G0:0007067 | mitotic nuclear division                                         |  | U |   |   |   |   |
| G0:1903047 | mitotic cell cycle process                                       |  | U |   |   |   |   |
| G0:0051301 | cell division                                                    |  | U |   |   |   |   |
| G0:0051276 | chromosome organization                                          |  | U |   |   |   |   |
| G0:0000278 | mitotic cell cycle                                               |  | U |   |   |   |   |
| G0:0022402 | cell cycle process                                               |  | U |   |   |   |   |
| G0:0098813 | nuclear chromosome segregation                                   |  | U |   |   |   |   |
| G0:0000819 | sister chromatid segregation                                     |  | U |   |   |   |   |
| G0:0007346 | regulation of mitotic cell cycle                                 |  | U |   |   |   |   |
| G0:0007088 | regulation of mitotic nuclear division                           |  | U |   |   |   |   |
| G0:0007049 | cell cycle                                                       |  | U |   |   |   |   |
| G0:0051783 | regulation of nuclear division                                   |  | U |   |   |   |   |
| G0:0051304 | chromosome separation                                            |  | U |   |   |   |   |
| G0:0010564 | regulation of cell cycle process                                 |  | U |   |   |   |   |
| G0:0030071 | regulation of mitotic metaphase/anaphase transition              |  | U |   |   |   |   |
| G0:0051983 | regulation of chromosome segregation                             |  | U |   |   |   |   |
| G0:1902099 | regulation of metaphase/anaphase transition of cell cycle        |  | U |   |   |   |   |
| G0:0007091 | metaphase/anaphase transition of mitotic cell cycle              |  | U |   |   |   |   |
| G0:0010965 | regulation of mitotic sister chromatid separation                |  | U |   |   |   |   |
| G0:0051726 | regulation of cell cycle                                         |  | U |   |   |   |   |
| G0:0000070 | mitotic sister chromatid segregation                             |  | U |   |   |   |   |
| G0:0044784 | metaphase/anaphase transition of cell cycle                      |  | U |   |   |   |   |
| G0:0051306 | mitotic sister chromatid separation                              |  | U |   |   |   |   |
| G0:1902589 | single-organism organelle organization                           |  | U |   |   |   |   |
| G0:0033047 | regulation of mitotic sister chromatid segregation               |  | U |   |   |   |   |
| G0:0033045 | regulation of sister chromatid segregation                       |  | U |   |   |   |   |
| G0:0044772 | mitotic cell cycle phase transition                              |  | U |   |   |   |   |
| G0:0033043 | regulation of organelle organization                             |  | U |   |   |   |   |
| G0:0044770 | cell cycle phase transition                                      |  | U |   |   |   |   |
| G0:0033044 | regulation of chromosome organization                            |  | U |   |   |   |   |
| G0:0032101 | regulation of response to external stimulus                      |  |   |   | D |   |   |
| G0:0030193 | regulation of blood coagulation                                  |  |   |   | D |   |   |
| G0:1900046 | regulation of hemostasis                                         |  |   |   | D |   |   |
| G0:0050818 | regulation of coagulation                                        |  |   |   | D |   |   |
| G0:0007596 | blood coagulation                                                |  |   |   | D | U |   |
| G0:0050817 | coagulation                                                      |  |   |   | D | U |   |
| G0:0007599 | hemostasis                                                       |  |   |   | D | U |   |
| G0:0061041 | regulation of wound healing                                      |  |   |   | D |   |   |
| G0:1903034 | regulation of response to wounding                               |  |   |   | D |   |   |
| G0:0050878 | regulation of body fluid levels                                  |  |   |   | D |   |   |
| G0:0009617 | response to bacterium                                            |  |   |   | D |   |   |
| G0:0042060 | wound healing                                                    |  |   |   | D | U |   |
| G0:0009605 | response to external stimulus                                    |  |   |   | D |   |   |
| G0:0007229 | integrin-mediated signaling pathway                              |  |   |   |   |   | D |
| G0:0050900 | leukocyte migration                                              |  |   |   |   |   | U |
| G0:0007160 | cell-matrix adhesion                                             |  |   |   |   |   | U |
| G0:0034113 | heterotypic cell-cell adhesion                                   |  |   |   |   |   | D |
| G0:0031589 | cell-substrate adhesion                                          |  |   |   |   |   | U |
| G0:0050901 | leukocyte tethering or rolling                                   |  |   |   |   |   | D |
| G0:0061756 | leukocyte adhesion to vascular endothelial cell                  |  |   |   |   |   | D |
| G0:0072678 | T cell migration                                                 |  |   |   |   |   | D |
| G0:0043113 | receptor clustering                                              |  |   |   |   |   | D |
| G0:0043589 | skin morphogenesis                                               |  |   |   |   |   | U |
| G0:0038065 | collagen-activated signaling pathway                             |  |   |   |   |   | U |
| G0:0001704 | formation of primary germ layer                                  |  |   |   |   |   | U |
| G0:0070208 | protein heterotrimerization                                      |  |   |   |   |   | U |
| G0:0007369 | gastrulation                                                     |  |   |   |   |   | U |
| G0:0009611 | response to wounding                                             |  |   |   |   |   | U |
| G0:0071560 | cellular response to transforming growth factor beta stimulus    |  |   |   |   |   | U |
| G0:0006929 | substrate-dependent cell migration                               |  |   |   |   |   | U |
| G0:0071559 | response to transforming growth factor beta                      |  |   |   |   |   | U |
| G0:0043588 | skin development                                                 |  |   |   |   |   | U |
| G0:0032964 | collagen biosynthetic process                                    |  |   |   |   |   | U |
| G0:0030199 | collagen fibril organization                                     |  |   |   |   |   | U |
| G0:0070206 | protein trimerization                                            |  |   |   |   |   | U |
| G0:0035987 | endodermal cell differentiation                                  |  |   |   |   |   | U |
| G0:1901698 | response to nitrogen compound                                    |  |   | U |   |   | U |
| G0:0031346 | positive regulation of cell projection organization              |  |   |   |   |   | U |

|            |                                                     |  |  |   |  |   |   |
|------------|-----------------------------------------------------|--|--|---|--|---|---|
| G0:0001101 | response to acid chemical                           |  |  |   |  | U |   |
| G0:1901701 | cellular response to oxygen-containing compound     |  |  |   |  | U |   |
| G0:0009790 | embryo development                                  |  |  |   |  | U |   |
| G0:0001706 | endoderm formation                                  |  |  |   |  | U |   |
| G0:0071230 | cellular response to amino acid stimulus            |  |  |   |  | U |   |
| G0:0044364 | killing of cells of other organism                  |  |  |   |  |   | D |
| G0:0031640 | disruption of cells of other organism               |  |  |   |  |   | D |
| G0:0045595 | regulation of cell differentiation                  |  |  | U |  |   |   |
| G0:0070372 | regulation of ERK1 and ERK2 cascade                 |  |  | U |  |   |   |
| G0:0070371 | ERK1 and ERK2 cascade                               |  |  | U |  |   |   |
| G0:0001932 | regulation of protein phosphorylation               |  |  | U |  |   |   |
| G0:0043408 | regulation of MAPK cascade                          |  |  | U |  |   |   |
| G0:0042325 | regulation of phosphorylation                       |  |  | U |  |   |   |
| G0:0051591 | response to cAMP                                    |  |  | U |  |   |   |
| G0:0010243 | response to organonitrogen compound                 |  |  | U |  |   |   |
| G0:0008284 | positive regulation of cell proliferation           |  |  | U |  |   |   |
| G0:0009725 | response to hormone                                 |  |  | U |  |   |   |
| G0:0019220 | regulation of phosphate metabolic process           |  |  | U |  |   |   |
| G0:0000165 | MAPK cascade                                        |  |  | U |  |   |   |
| G0:0051174 | regulation of phosphorus metabolic process          |  |  | U |  |   |   |
| G0:0042542 | response to hydrogen peroxide                       |  |  | U |  |   |   |
| G0:0001934 | positive regulation of protein phosphorylation      |  |  | U |  |   |   |
| G0:0032355 | response to estradiol                               |  |  | U |  |   |   |
| G0:0031399 | regulation of protein modification process          |  |  | U |  |   |   |
| G0:0023014 | signal transduction by protein phosphorylation      |  |  | U |  |   |   |
| G0:0001525 | angiogenesis                                        |  |  | U |  |   |   |
| G0:0042327 | positive regulation of phosphorylation              |  |  | U |  |   |   |
| G0:0046683 | response to organophosphorus                        |  |  | U |  |   |   |
| G0:0014074 | response to purine-containing compound              |  |  | U |  |   |   |
| G0:0006468 | protein phosphorylation                             |  |  | U |  |   |   |
| G0:0010562 | positive regulation of phosphorus metabolic process |  |  | U |  |   |   |
| G0:0045937 | positive regulation of phosphate metabolic process  |  |  | U |  |   |   |
| G0:0031960 | response to corticosteroid                          |  |  | U |  |   |   |
| G0:0048514 | blood vessel morphogenesis                          |  |  | U |  |   |   |
| G0:0060429 | epithelium development                              |  |  | U |  |   |   |
| G0:0009628 | response to abiotic stimulus                        |  |  | U |  |   |   |
| G0:0031401 | positive regulation of protein modification process |  |  | U |  |   |   |
