# Supplementary material for: Molecular patterns of cancer colonisation in lymph nodes of breast cancer patients
Source: PubMed Central journal article supplement (PMC6247766; doi:10.1186/s13058-018-1070-3), 2018-11-20
Supplement: 13058_2018_1070_MOESM5_ESM.pdf [file 13058_2018_1070_MOESM5_ESM.pdf]

| Ensembl ID      | Gene Name | Cell Type           | Scenario 1 | Scenario 2 | Scenario 3 | Scenario 4 | Scenario 5 | Scenario 6 |
|-----------------|-----------|---------------------|------------|------------|------------|------------|------------|------------|
| ENSG00000121966 | CXCR4     | T cells             | U          |            | U          |            |            |            |
| ENSG00000115414 | FN1       | DC                  | D          |            |            |            | U          |            |
| ENSG00000139626 | ITGB7     | Th1                 |            |            |            |            | D          |            |
| ENSG00000026508 | CD44      | MDSC                |            |            |            |            | D          |            |
| ENSG00000115232 | ITGA4     | Th1                 |            |            |            |            | D          |            |
| ENSG00000132185 | FCRLA     | Immature B cells    | U          |            |            |            |            | D          |
| ENSG00000196092 | PAX5      | Activated B cells   | U          |            |            |            |            | D          |
| ENSG00000213658 | LAT       | T cells             | U          |            |            |            |            | D          |
| ENSG00000134443 | GRP       | iDC                 | D          |            |            |            |            | D          |
| ENSG00000069482 | GAL       | Activated CD8       |            |            |            |            |            | D          |
| ENSG00000105205 | CLC       | Mast cells          |            |            |            |            |            | D          |
| ENSG00000124469 | CEACAM8   |                     |            |            |            |            |            | D          |
| ENSG00000254415 | SIGLEC14  | Mast cells          |            |            |            |            |            | D          |
| ENSG00000104921 | FCER2     | MDSC                |            |            |            |            |            | D          |
| ENSG00000167483 | FAM129C   | Immature B cells    |            |            |            |            |            | D          |
| ENSG00000183691 | NOG       | MDSC                |            |            |            |            |            | D          |
| ENSG00000137101 | CD72      | Treg                |            |            |            |            |            | D          |
| ENSG00000012124 | CD22      | Immature B cells    |            |            |            |            |            | D          |
| ENSG00000142512 | SIGLEC10  | Th2                 |            |            |            |            |            | D          |
| ENSG00000124334 | IL9R      | Treg                |            |            |            |            |            | D          |
| ENSG00000176884 | GRIN1     | NK56 dim            |            |            |            |            |            | D          |
| ENSG00000131196 | NFATC1    | T cells             |            |            |            |            |            | D          |
| ENSG00000120539 | MASTL     | Activated CD4       |            |            |            |            |            | D          |
| ENSG00000163564 | PYHIN1    | Central memory CD8  |            |            |            |            |            | D          |
| ENSG00000134256 | CD101     | NKT                 |            |            |            |            |            | D          |
| ENSG00000223865 | HLA-DPB1  | Effector memory CD8 | U          |            |            |            |            |            |
| ENSG00000137509 | PRCP      | mDC                 | U          |            |            |            |            |            |
| ENSG00000102265 | TIMP1     | Mast cells          | U          |            |            |            |            |            |
| ENSG00000081237 | PTPRC     | Th1                 | U          |            |            |            |            |            |
| ENSG00000227507 | LTB       | Th1                 | U          |            |            |            |            |            |
| ENSG00000188404 | SELL      | Cytotoxic cells     | U          |            |            |            |            |            |
| ENSG00000090104 | RGS1      | Central memory CD8  | U          |            |            |            |            |            |
| ENSG00000023445 | BIRC3     | Effector memory CD8 | U          |            |            |            |            |            |
| ENSG00000169508 | GPR183    | Central memory CD8  | U          |            |            |            |            |            |
| ENSG00000172724 | CCL19     | Treg                | U          |            |            |            |            |            |
| ENSG00000141293 | SKAP1     | Th2                 | U          |            |            |            |            |            |
| ENSG00000169442 | CD52      | Th1                 | U          |            |            |            |            |            |
| ENSG00000137077 | CCL21     | Activated B cells   | U          |            |            |            |            |            |
| ENSG00000083454 | P2RX5     | Th1                 | U          |            |            |            |            |            |
| ENSG00000153064 | BANK1     | Immature B cells    | U          |            |            |            |            |            |
| ENSG00000163534 | FCRL1     | Immature B cells    | U          |            |            |            |            |            |
| ENSG00000009790 | TRAF3IP3  | Activated B cells   | U          |            |            |            |            |            |
| ENSG00000125245 | GPR18     | TFH                 | U          |            |            |            |            |            |
| ENSG00000035720 | STAP1     | Immature B cells    | U          |            |            |            |            |            |
| ENSG00000163519 | TRAT1     | Th1                 | U          |            |            |            |            |            |
| ENSG00000162894 | FCMR      |                     | U          |            |            |            |            |            |
| ENSG00000241106 | HLA-DOB   | Immature B cells    | U          |            |            |            |            |            |
| ENSG00000185811 | IKZF1     | MDSC                | U          |            |            |            |            |            |
| ENSG00000168685 | IL7R      | Th1                 | U          |            |            |            |            |            |
| ENSG00000164691 | TAGAP     | Immature B cells    | U          |            |            |            |            |            |
| ENSG00000160856 | FCRL3     | Immature B cells    | U          |            |            |            |            |            |
| ENSG00000078081 | LAMP3     | Th2                 | U          |            |            |            |            |            |
| ENSG00000182866 | LCK       | T cells             | U          |            |            |            |            |            |
| ENSG00000126353 | CCR7      | TFH                 | U          |            |            |            |            |            |
| ENSG00000162692 | VCAM1     | DC                  | U          |            |            |            |            |            |
| ENSG00000167286 | CD3D      | T cells             | U          |            |            |            |            |            |
| ENSG00000172005 | MAL       | Central memory CD4  | U          |            |            |            |            |            |
| ENSG00000197943 | PLCG2     | NK                  | U          |            |            |            |            |            |
| ENSG00000140968 | IRF8      | T cells             | U          |            |            |            |            |            |
| ENSG00000134954 | ETS1      | Immature B cells    | U          |            |            |            |            |            |
| ENSG00000143119 | CD53      | Th1                 | U          |            |            |            |            |            |
| ENSG00000112149 | CD83      | TFH                 | U          |            |            |            |            |            |
| ENSG00000110031 | LPXN      | iDC                 | U          |            |            |            |            |            |
| ENSG00000163751 | CPA3      | Mast cells          | D          |            |            |            |            |            |
| ENSG00000162493 | PDPN      | DC                  | D          |            |            |            |            |            |
| ENSG00000135914 | HTR2B     | Th2                 | D          |            |            |            |            |            |
| ENSG00000158477 | CD1A      | T cells             | D          |            |            |            |            |            |
| ENSG00000204592 | HLA-E     | NK56 dim            | D          |            |            |            |            |            |
| ENSG00000136235 | GPNMB     | TGD                 | D          |            |            |            |            |            |
| ENSG00000104213 | PDGFRL    | DC                  | D          |            |            |            |            |            |
| ENSG00000123610 | TNFAIP6   | Mast cells          | D          |            |            |            |            |            |
| ENSG00000124813 | RUNX2     | Memory B cells      | D          |            |            |            |            |            |
| ENSG00000203747 | FCGR3A    | Effector memory CD8 | D          |            |            |            |            |            |
| ENSG00000122862 | SRGN      | Monocytes           | D          |            |            |            |            |            |
| ENSG00000099860 | GADD45B   | Treg                | D          |            |            |            |            |            |
| ENSG00000134363 | FST       | Mast cells          | D          |            |            |            |            |            |
| ENSG00000131981 | LGALS3    | MDSC                | D          |            |            |            |            |            |
| ENSG00000164949 | GEM       | Treg                | D          |            |            |            |            |            |
| ENSG00000118785 | SPP1      | TGD                 | D          |            |            |            |            |            |
| ENSG00000117322 | CR2       | MDSC                | B          |            |            |            |            |            |
| ENSG00000117091 | CD48      | Th1                 | B          |            |            |            |            |            |
| ENSG00000164109 | MAD2L1    | Activated CD4       |            | U          |            |            |            |            |
| ENSG00000115415 | STAT1     | T cells             |            | U          |            |            |            |            |
| ENSG00000138160 | KIF11     | Activated CD4       |            | U          |            |            |            |            |
| ENSG00000011426 | ANLN      | Activated CD4       |            | U          |            |            |            |            |
| ENSG00000126787 | DLGAP5    | Activated CD4       |            | U          |            |            |            |            |
| ENSG00000120738 | EGR1      | Eosinophil          |            | D          |            |            |            |            |
| ENSG00000144642 | RBMS3     | Th2                 |            | D          |            |            |            |            |
| ENSG00000174059 | CD34      | Treg                |            | D          |            |            |            |            |
| ENSG00000017427 | IGF1      | Macrophages         |            | D          |            |            |            |            |
| ENSG00000134138 | MEIS2     | Mast cells          |            | D          |            |            |            |            |
| ENSG00000092009 | CMA1      | Mast cells          |            | D          |            |            |            |            |
| ENSG00000164741 | DLC1      | Th2                 |            | D          |            |            |            |            |
